# Supplementary material for: Synthetic modeling reveals HOXB genes are critical for the initiation and maintenance of human leukemia
Source: PubMed Central journal article supplement (PMC6606637; doi:10.1038/s41467-019-10510-8), 2019-07-02
Supplement: 41467_2019_10510_MOESM1_ESM.pdf [file 41467_2019_10510_MOESM1_ESM.pdf]

## SUPPLEMENTARY INFORMATION

for

### **Synthetic modeling reveals HOXB genes are critical for the initiation and maintenance of human leukemia**

Manabu Kusakabe, Ann Chong Sun, Kateryna Tyshchenko, Rachel Wong, Aastha Nanda, Claire Shanna, Samuel Gusscott, Elizabeth A. Chavez, Alireza Lorzadeh, Alice Zhu, Ainsleigh Hill, Stacy Hung, Scott Brown, Artem Babaian, Xuehai Wang, Robert A. Holt, Christian Steidl, Aly Karsan, R. Keith Humphries, Connie J. Eaves, Martin Hirst & Andrew P. Weng

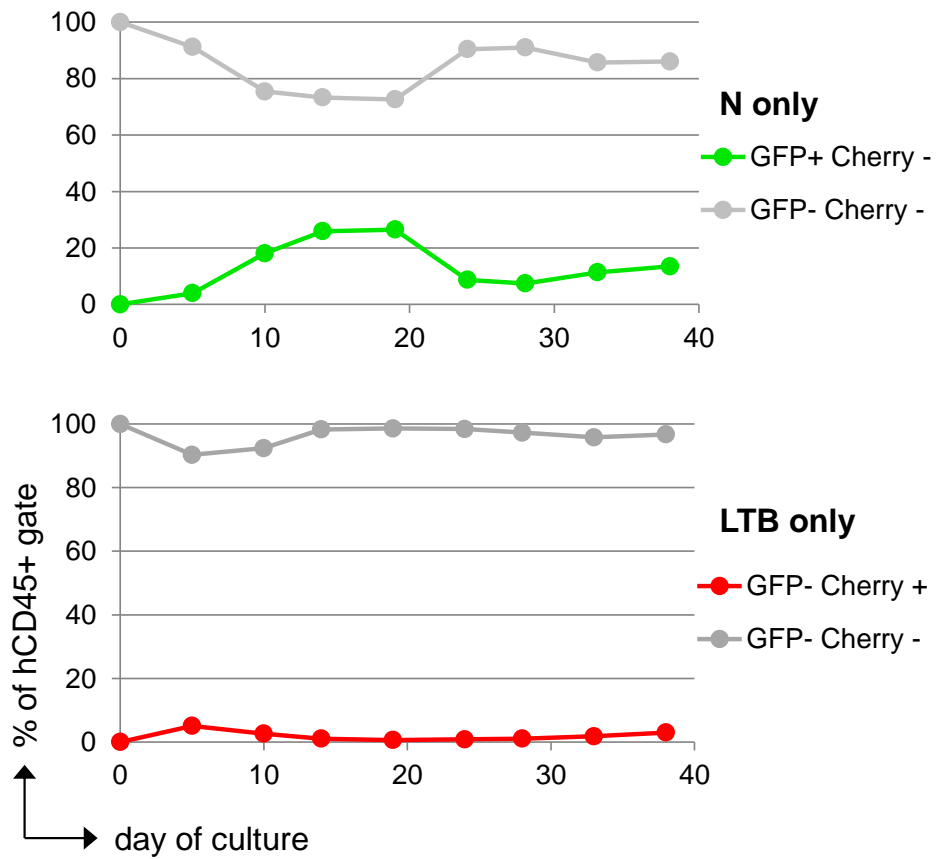

**Supplementary Figure 1. Transduction with NOTCH1ΔE or LMO2-TAL1-BMI1 alone does not support CB expansion *in vitro***

Flow cytometric tracking of transduced CB cells. CD34+ CB cells were transduced with NOTCH1ΔE-GFP or LMO2-TAL1-BMI1-Cherry lentivirus on days 0 and 5, and cultured on OP9-DL1 feeders.

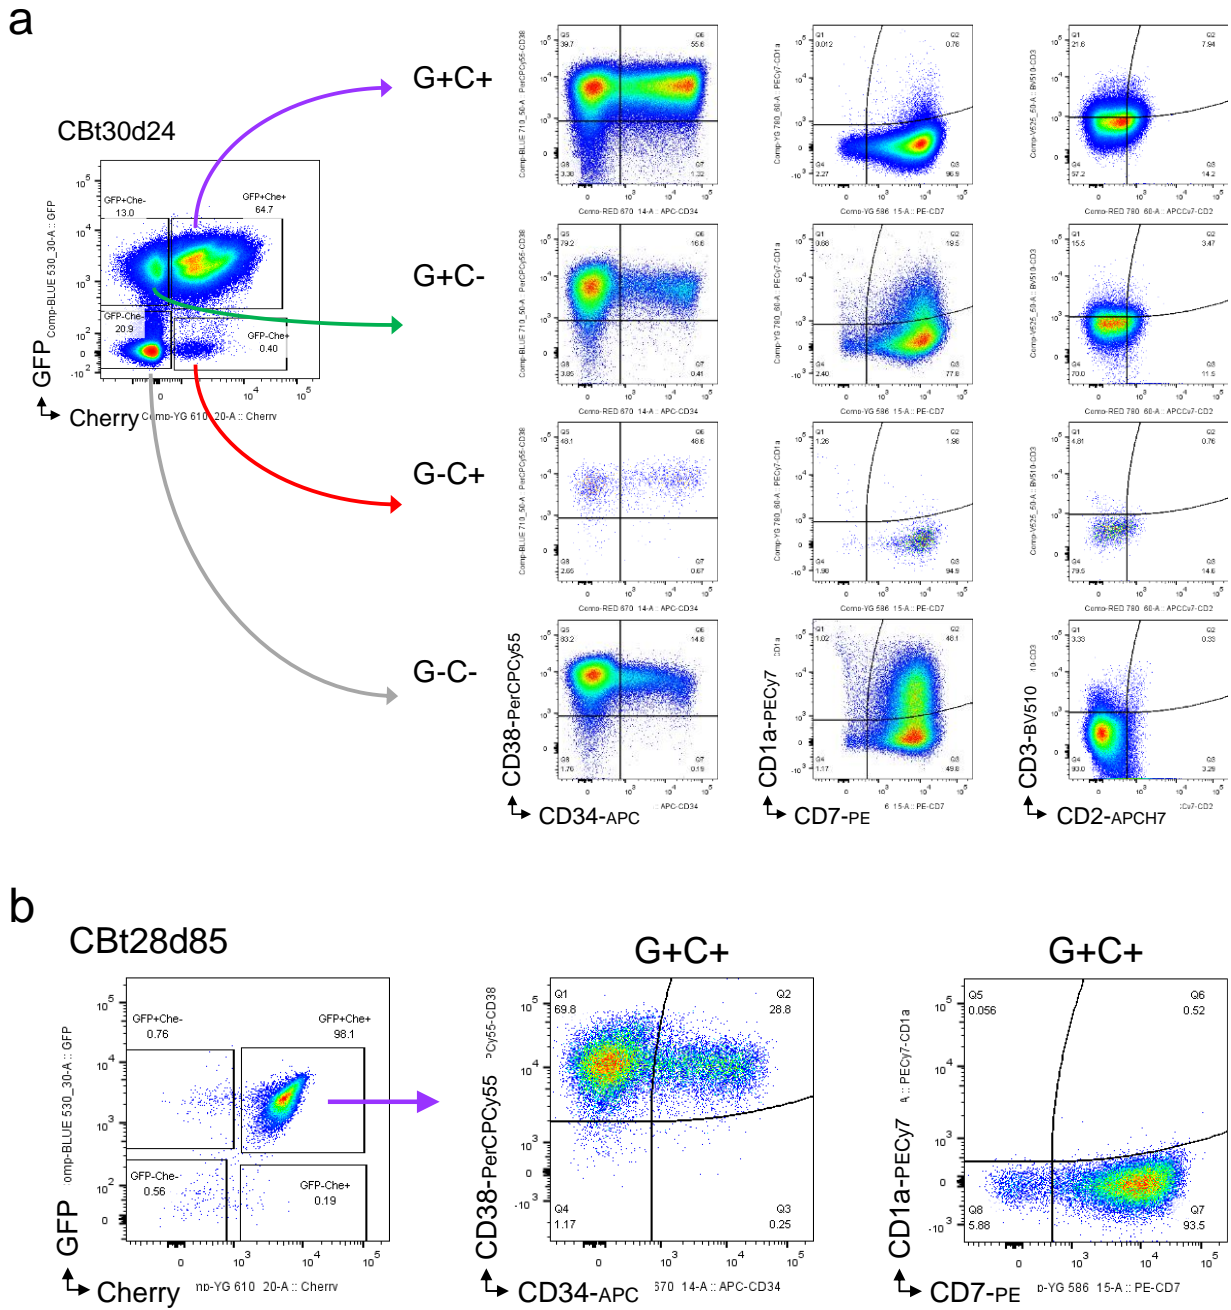

**Supplementary Figure 2. Immunophenotype of transduced CB cells in OP9-DL1 co-cultures**

Flow cytometric analysis. Representative plots of gated, live human CD45+ cells after **a)** 24 days and **b)** 85 days in culture.

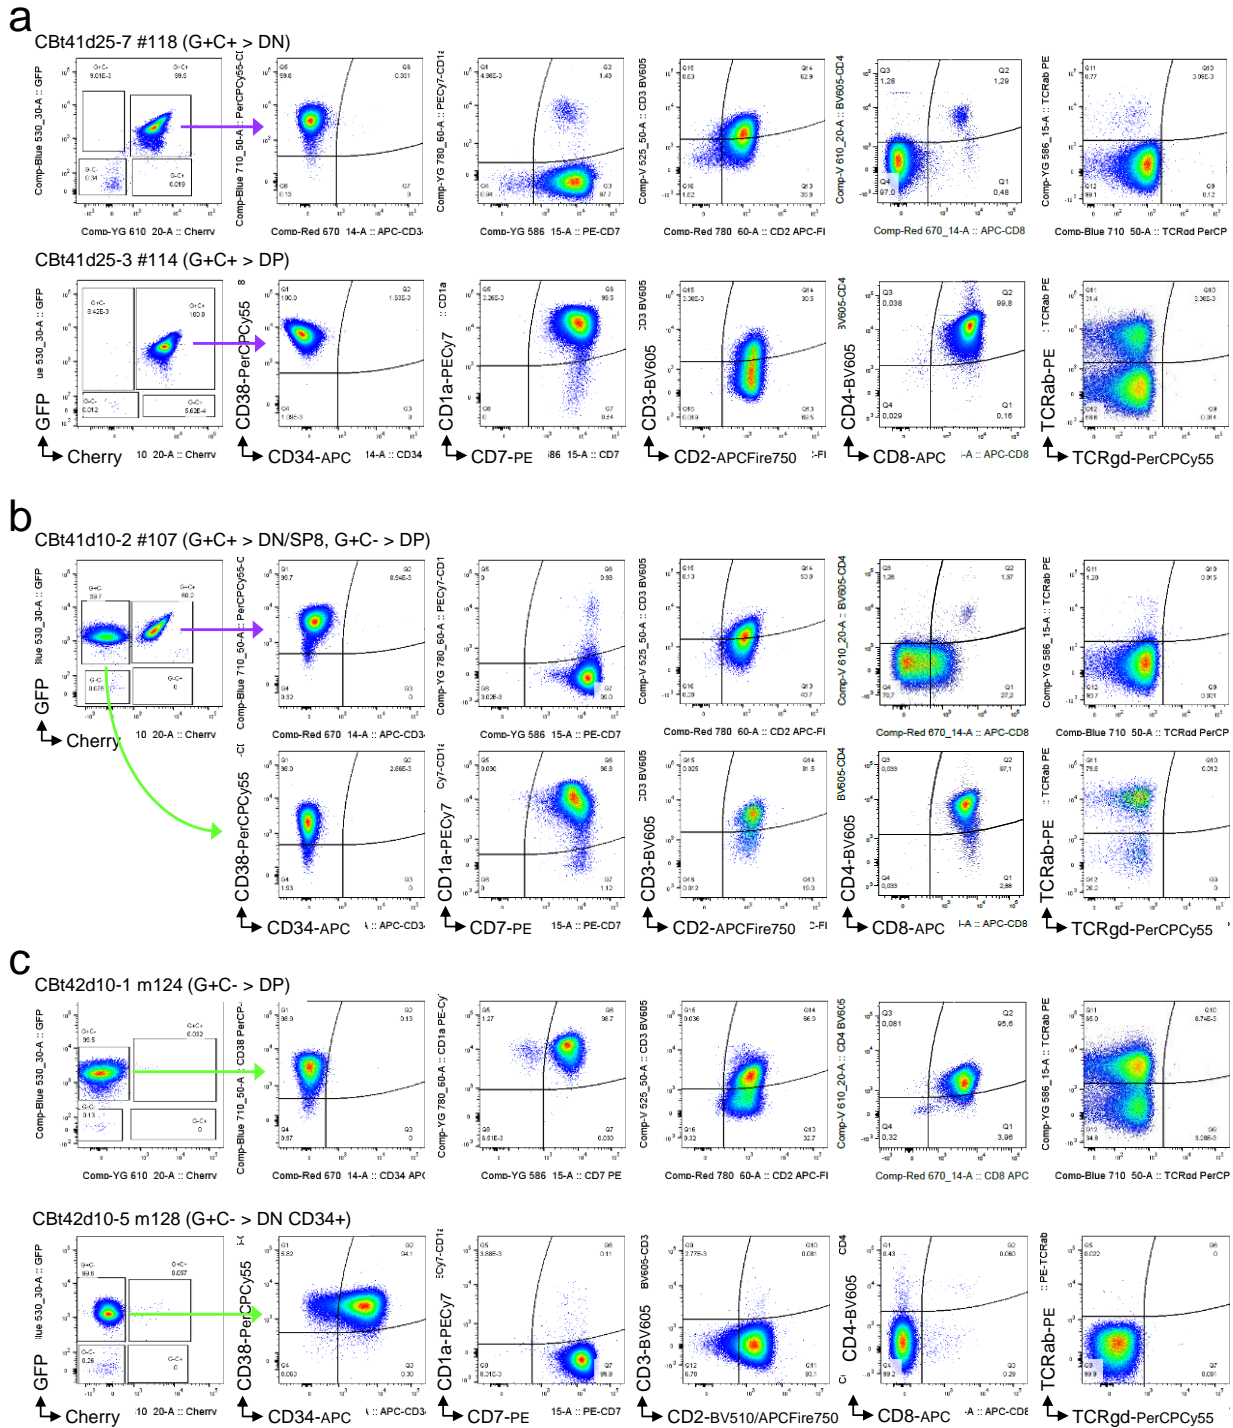

### Supplementary Figure 3. Immunophenotype of CB leukemias from clinically morbid mice

Flow cytometric analysis. Representative plots of freshly explanted bone marrow cells from primary NSG recipients of transduced CB cells. All animals attained clinically morbid disease endpoints. Gated, live human CD45+ cells are shown. **a)** G+C+ leukemias. **b)** Mixed G+C+/G+C- leukemia. **c)** G+C- leukemias.

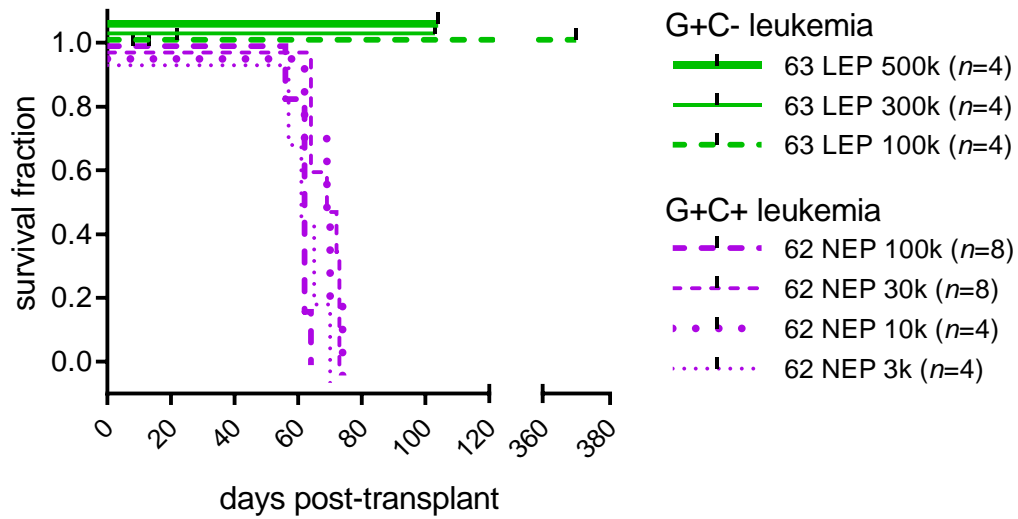

**Supplementary Figure 4. Limiting dilution transplant analysis**

Kaplan-Meier survival curves for secondary recipient mice transplanted with the indicated doses (500k to 3k) of primary NLTB-CB leukemia cells (CBt28d10-2 #62\_NEP; G+C+) or N only-CB leukemia cells (CBt28d10-3 #63\_LEP; G+C-). The number of recipients (n) for each cell dose are shown in parentheses. All leukemic animals achieved clinically morbid disease endpoints requiring euthanasia.

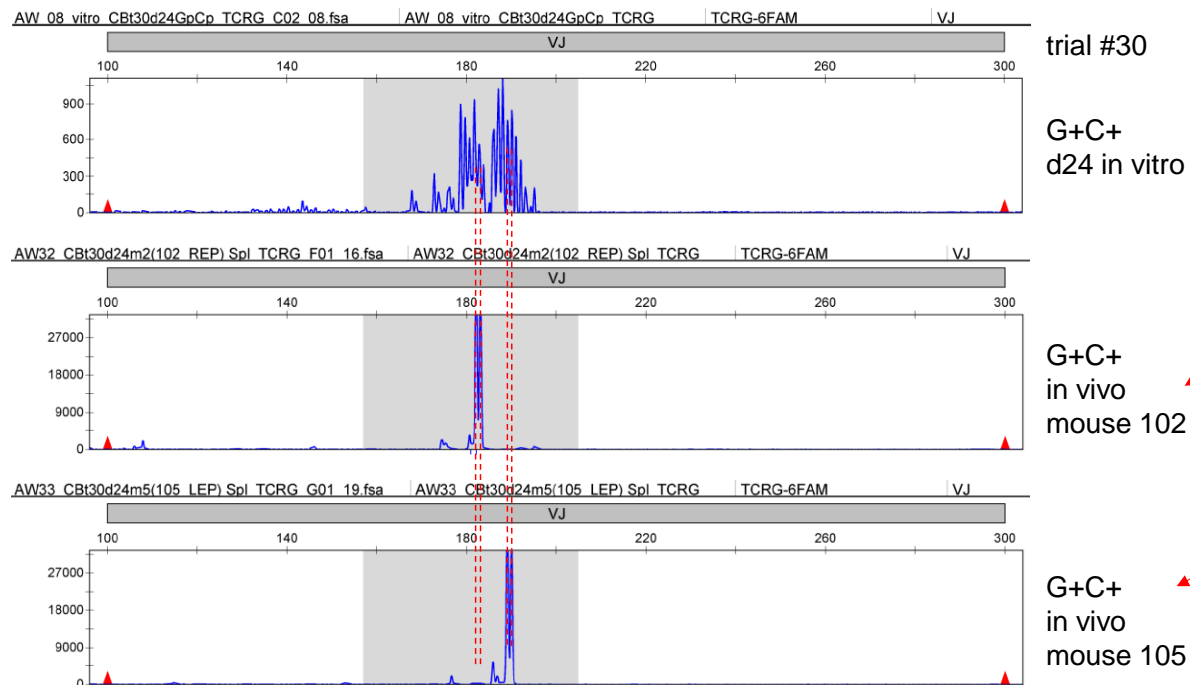

### Supplementary Figure 5. BIOMED-2 TCRG clonality assay

Doubly transduced (G+C+) CB cells were FACS sorted from day 24 *in vitro* cultures, as well as from the leukemic mice into which the cultured cells were injected. Genomic DNA was then extracted, and the distribution of amplified TCRG DNA fragments analyzed by GeneScan (Applied Biosystems). Dotted red lines are overlaid to facilitate comparison of peak sizes between samples. Peak sizes are reproducible within less than 0.5 bp.

trial 30

day 0

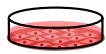

day 10

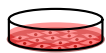

day 24

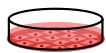

81

82

83

102

105

### STR loci

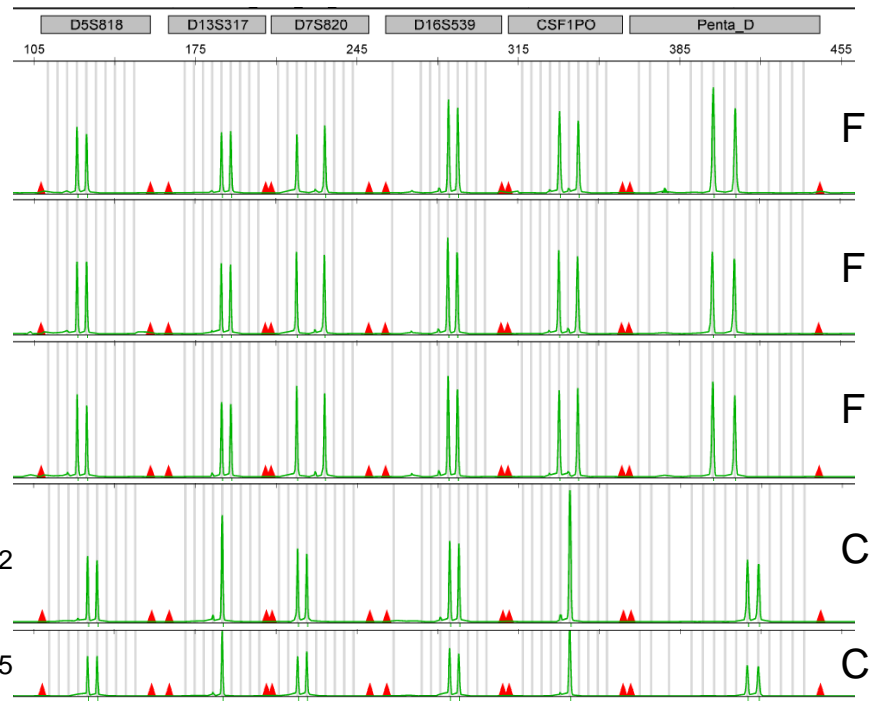

### Supplementary Figure 6. STR profiling of CB leukemias

Genomic DNAs from primary CB leukemias were profiled by Promega PowerPlex 16HS assay. STR patterns from 2 different individual donors (C, F) can be discerned. The same pool of donor cord blood cells was used for trials #28 and #30.

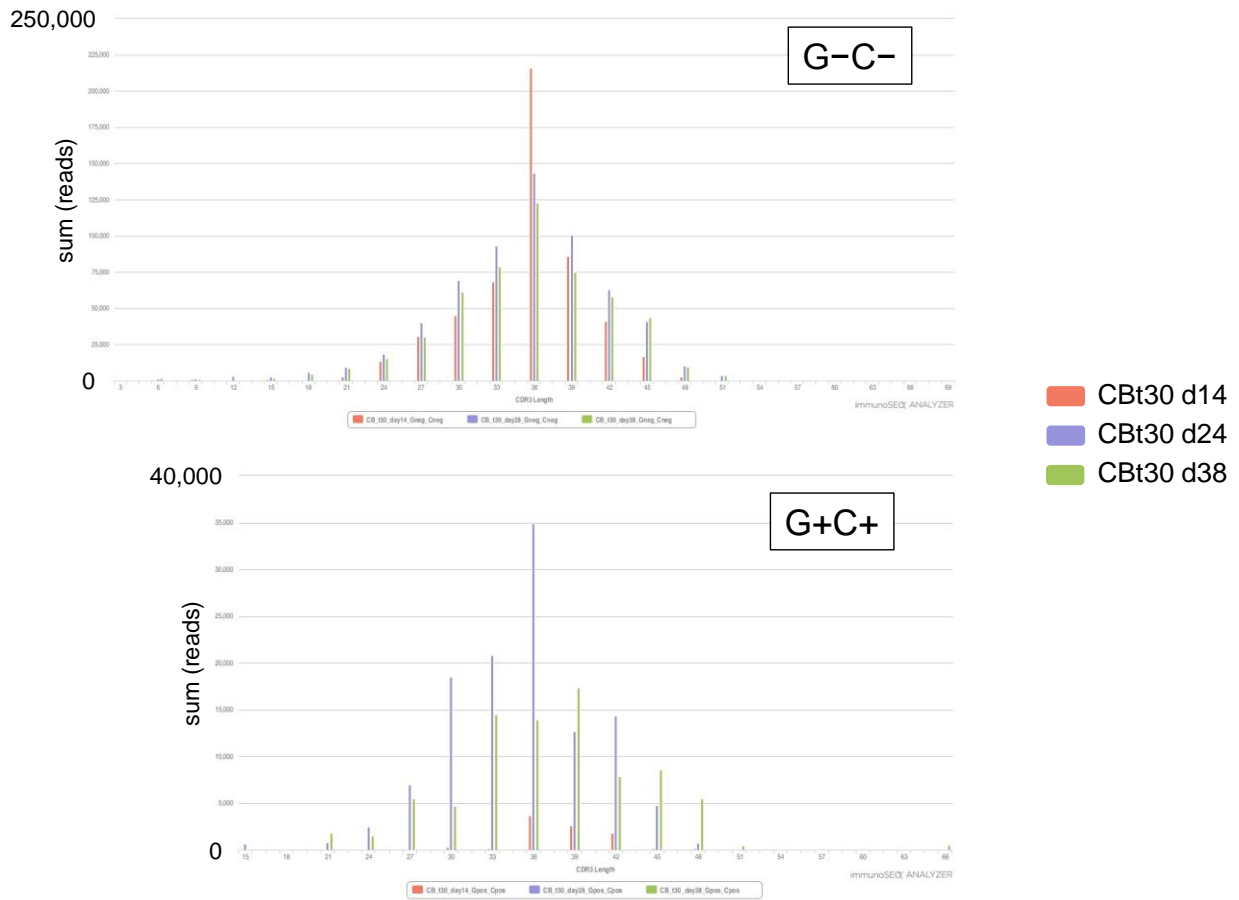

**Supplementary Figure 7. TCRG CDR3 fragment length analysis from ImmunoSEQ data**

ImmunoSEQ TCRG clonality assay. CB cells were transduced with N+LTB lentiviruses and cultured on OP9-DL1 feeders. Culture samples were taken at 14, 24, and 38 days. Doubly transduced (G+C+) and non-transduced (G-C-) subsets were FACS sorted and genomic DNA extracted for ImmunoSEQ TCRG (Survey) analysis by Adaptive Biotechnologies. Distributions of CDR3 fragment lengths are plotted.



**Supplementary Figure 8. Variation among synthetic CB leukemias is mostly donor-related**

**a**

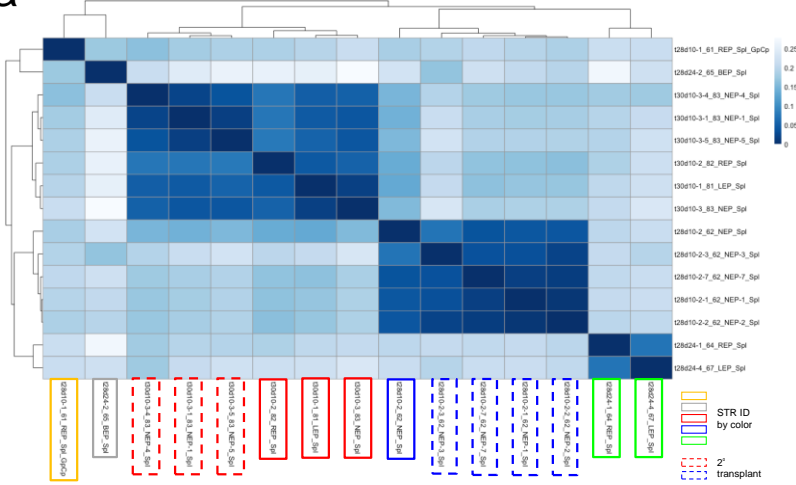

**a)** Unsupervised hierarchical clustering of 15 synthetic CB leukemias (NLTB G+C+) based on correlation distances (1-Spearman coefficient) from RNA-seq data. Correlation distances were calculated using the top 1,000 variable genes. Color scale is (1-Spearman) correlation distance. Darker blue indicates greater similarity.

**b**

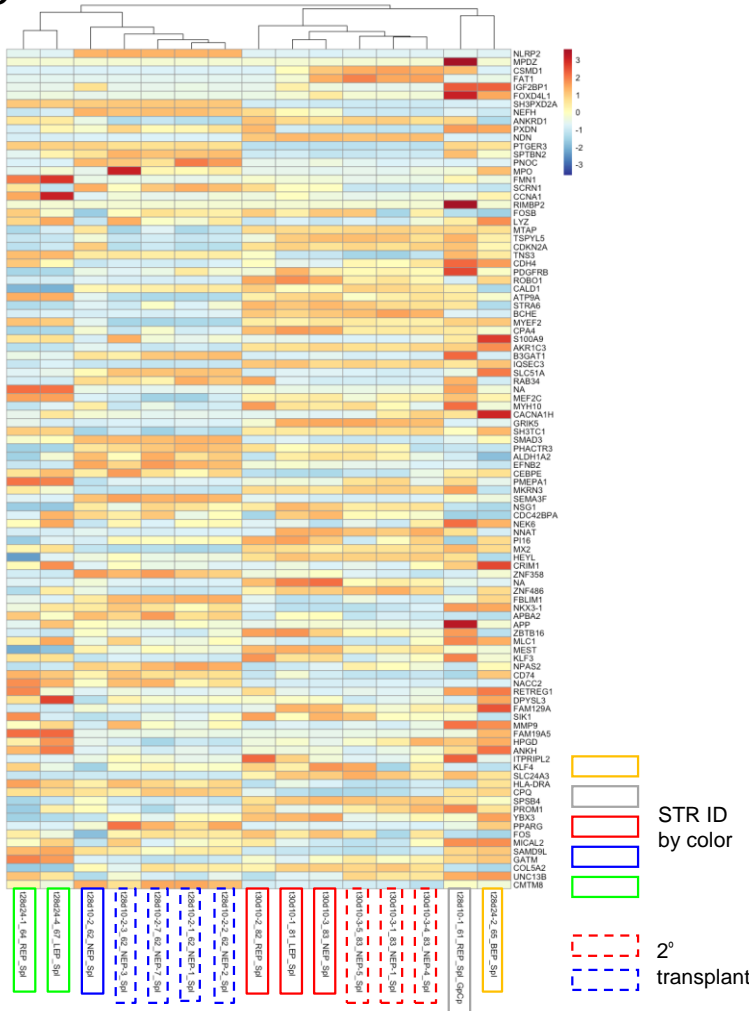

**b)** Unsupervised hierarchical clustering of 15 synthetic CB leukemias (NLTB G+C+) based on mRNA expression values from RNA-seq data. The top 100 variable protein coding genes (X/Y chromosomes excluded) were used for clustering. Genes are ordered top to bottom from most to least variation across the included samples. Color heatmap is scaled by gene (=row) with mean=0 and SD=1.

Individual CB donors were discriminated by STR profiling.

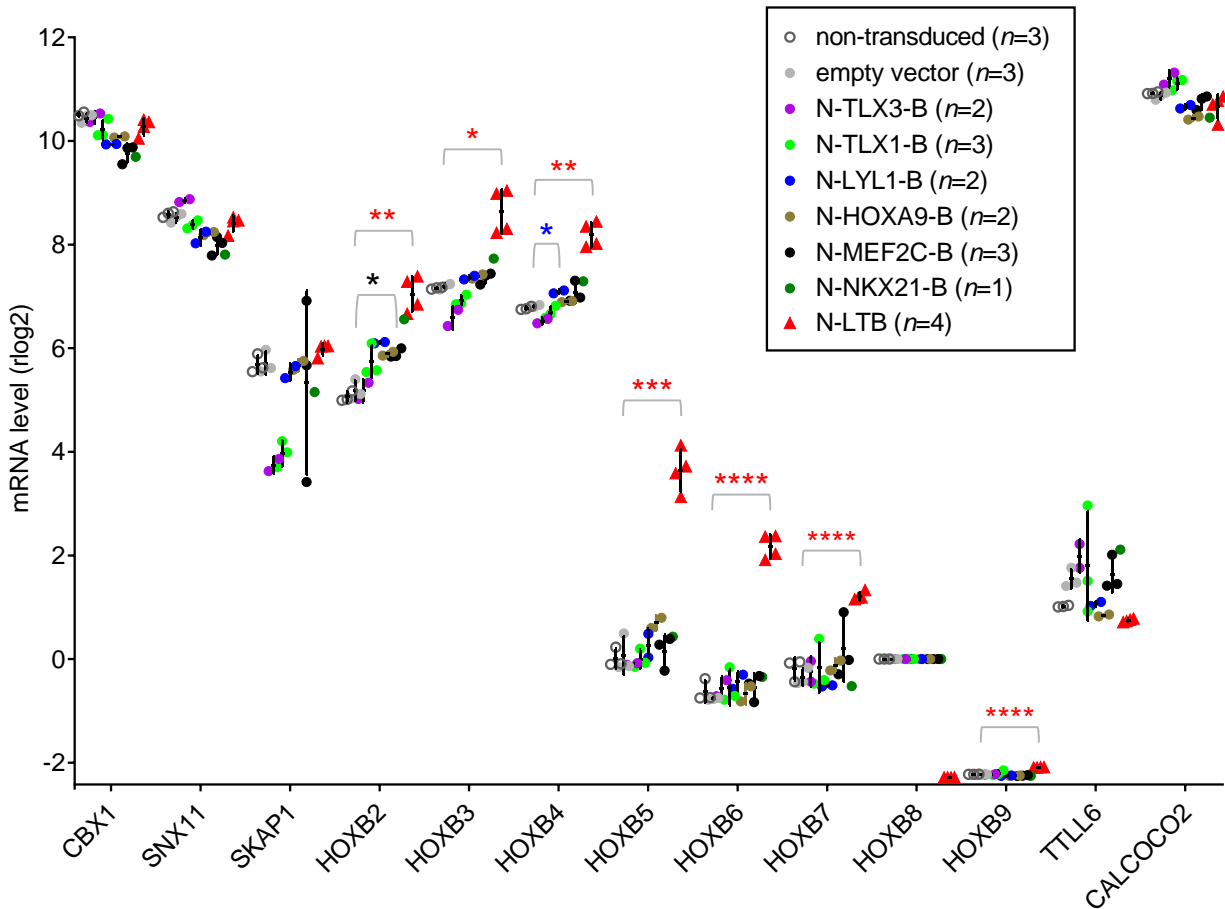

**Supplementary Figure 9. Upregulation of multiple anterior HOXB genes is unique to the N+LTB combination of T-cell oncogenes**

mRNA expression level of HOXB and flanking genes from RNA-seq of nascently transduced CB cells. CB cells were transduced with the indicated combinations of GFP and Cherry lentiviruses, then cultured on OP9-DL1 feeders for 19 days (except 2 samples for each of N-TLX1-B and N-MEF2C-B were collected after 52 days in order to obtain sufficient cells for library construction). RNA was prepared from FACS-sorted doubly (G+C+) transduced cells. Rlog values from DESeq2 are plotted. Each data point represents an individual sample. Bars indicate mean $\pm$ SD for each set of colored dots. Statistical comparisons are shown only for significantly increased expression of HOXB genes as compared to empty vector-transduced controls.

*\*,  $p < 0.05$ ; \*\*,  $p < 0.01$ ; \*\*\*,  $p < 0.001$  (one-tailed t-test with Holm-Sidak correction for multiple comparisons).*

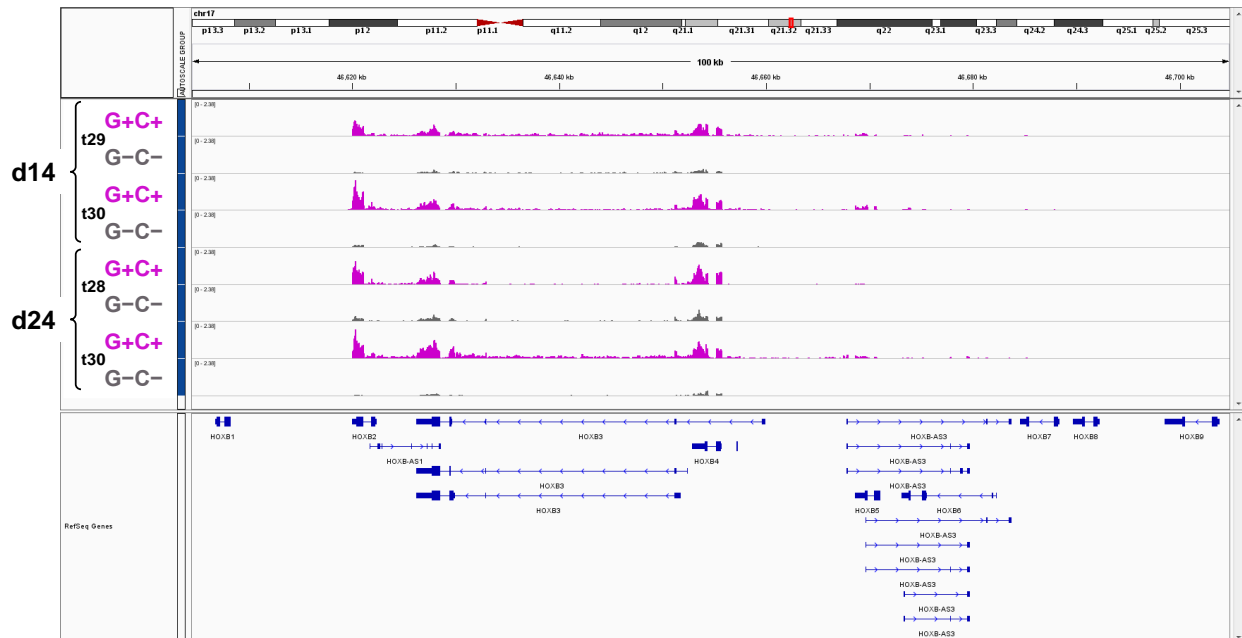

**Supplementary Figure 10. RNA-seq tracks over the HOXB locus from NLTB-transduced CB cells**

Individual RNA-seq tracks over the HOXB locus from FACS sorted, NLTB-transduced (G+C+) and non-transduced (G-C-) CB cells cultured for 14 and 24 days on OP9-DL1 feeders. Track heights are autoscaled according to the maximum sample with coverage values normalized per 1 million features.

*d*, day; *t*, experimental trial #.

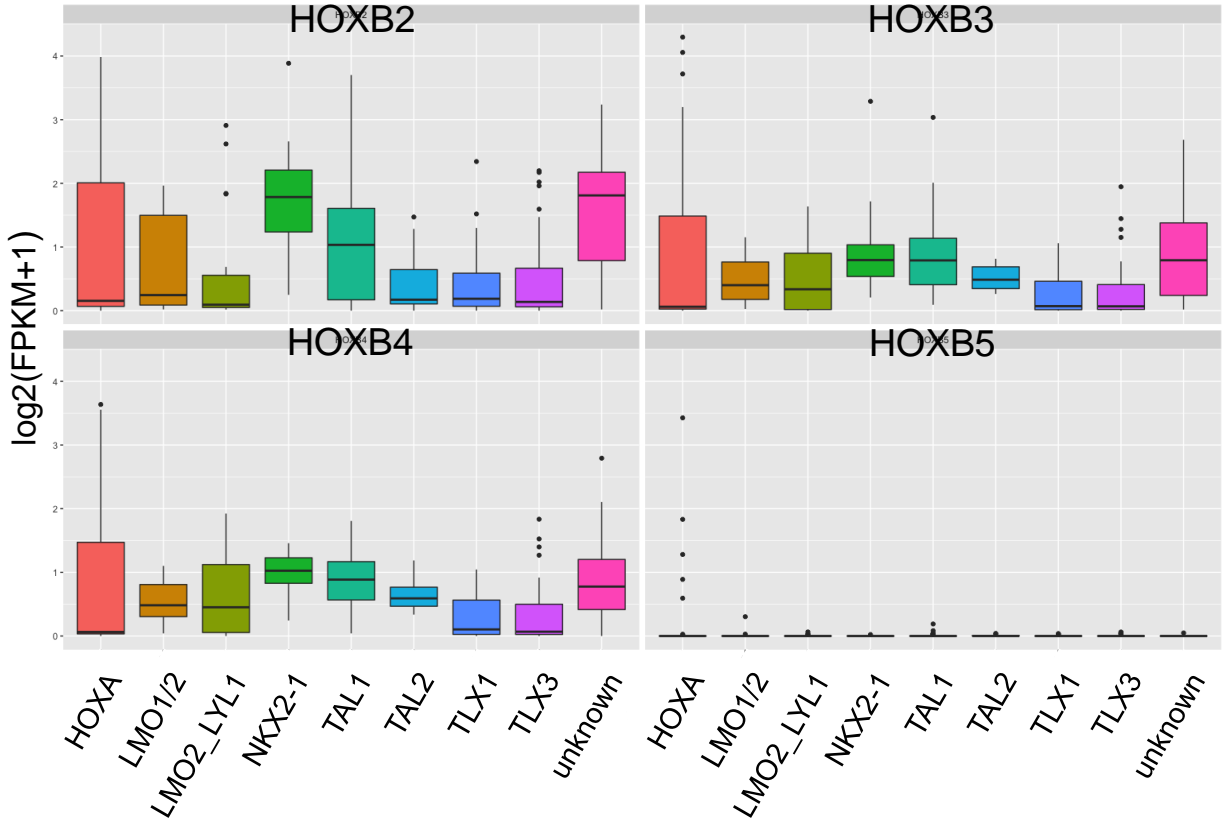

**Supplementary Figure 11. HOXB gene expression levels across genetic/transcription factor subgroups of patient T-ALLs**

HOXB gene expression levels from patient T-ALL RNA-seq data (252 patients from the COG TARGET study). Tukey box and whisker plots of  $\log_2(\text{FPKM}+1)$  values are shown.

Genetic/transcription factor subgroups are as defined by Liu et al<sup>1</sup>.

Data are reanalyzed from NCBI dbGaP accession phs000218/000464<sup>1</sup>.

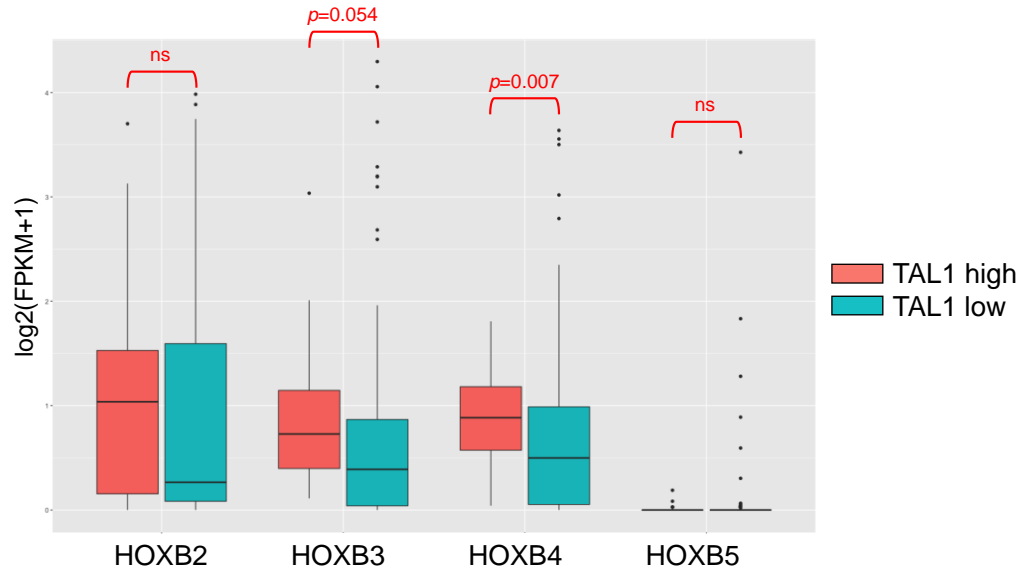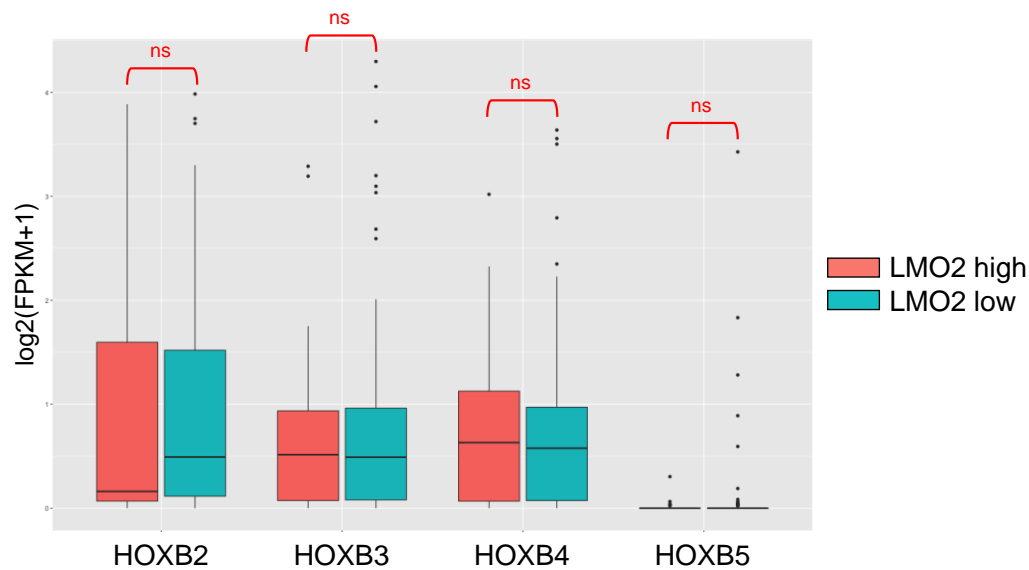

**Supplementary Figure 12. HOXB gene expression levels among high vs low expressing subsets for TAL1 and LMO2**

HOXB gene expression levels from patient T-ALL RNA-seq data (252 patients from the COG TARGET study). Tukey box and whisker plots of log<sub>2</sub>(FPKM+1) values are shown. The high expressing subsets were defined as the top quintile of expressers for the indicated gene, with the remainder included in the low group.

Statistical *p*-values are shown for comparisons between high vs. low subgroups (Welch's two-tailed *t*-test). *ns*, not significant.

Data are reanalyzed from NCBI dbGaP accession phs000218/000464<sup>1</sup>.

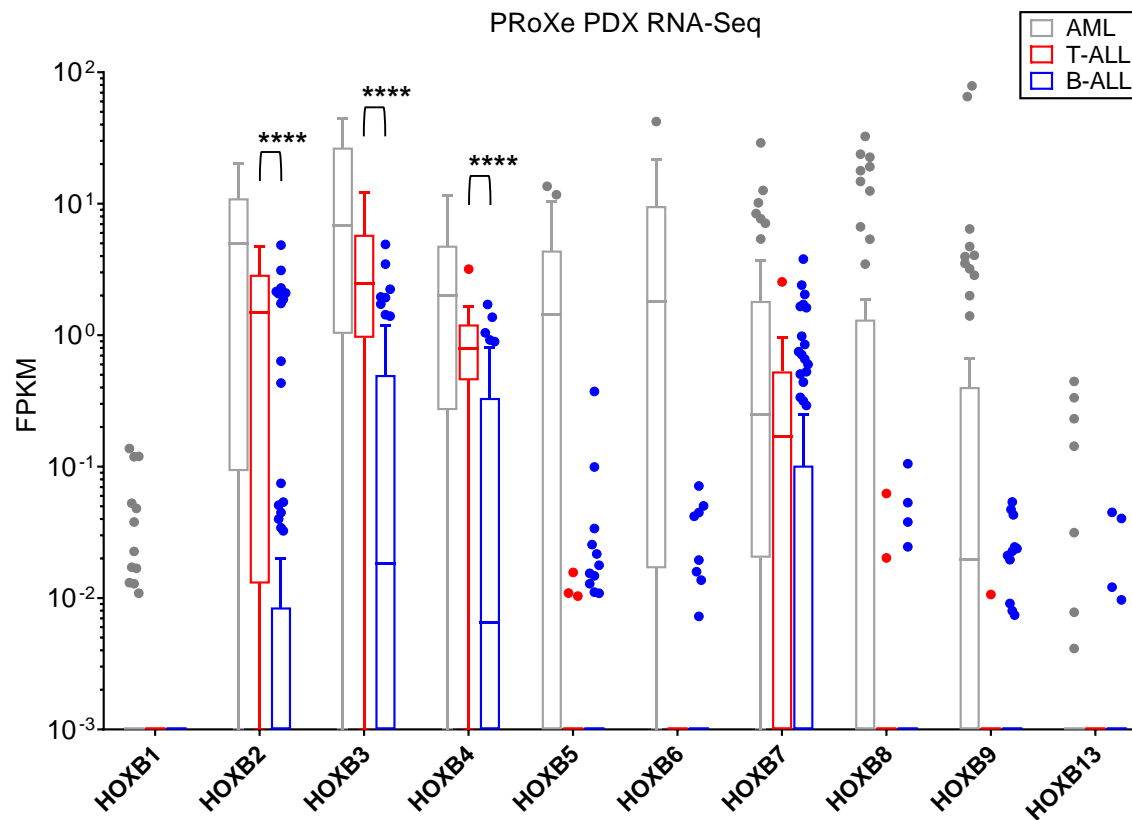

### Supplementary Figure 13. HOXB gene expression patterns among different types of human acute leukemia

HOXB mRNA expression level in human T-ALL ( $n=34$ ), B-ALL ( $n=111$ ), and AML ( $n=54$ ) PDX samples from the PRoXe repository<sup>2</sup>. FPKM values were calculated from RNA-seq data using Cufflinks. Tukey box and whiskers are shown (Boxes extend from 25<sup>th</sup> to 75<sup>th</sup> percentile. Horizontal line indicates the median. Whiskers indicate 1.5X the interquartile range above and below the box hinges, or the largest and smallest values, respectively. Datapoints beyond the whiskers are plotted individually).

Statistical  $p$ -values are shown only for comparisons between T-ALL and B-ALL. \*\*\*\*,  $p$ -adj <0.0001 (two-tailed  $t$ -test with Holm-Sidak correction for multiple comparisons). All other T-ALL vs. B-ALL comparisons are not significant.

Data are reanalyzed from NCBI SRA accession SRP103099<sup>2</sup>.

**a**

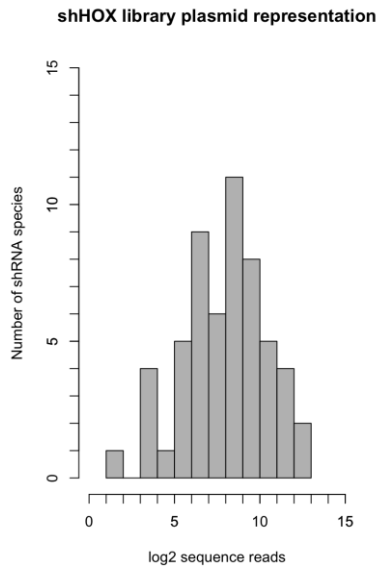

**Supplementary Figure 14. Next generation sequencing of pooled shRNA library to assess representation of input clones**

Histograms of clone representation.

**a)** Original pooled shRNA library at the plasmid DNA stage before production of lentivirus. The total number of identified shRNA species is 56, demonstrating that all input clones targeting HOX genes were recovered.

**b)** PCR amplified clones from genomic DNA collected 2 days after lentiviral transduction into cells. In each plot, the total number of identified shRNA species is 59, demonstrating that all input clones targeting HOX genes plus 3 controls were recovered.

**b**

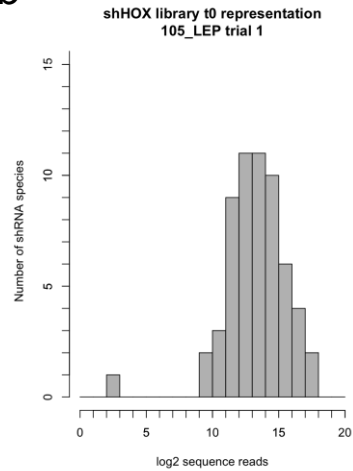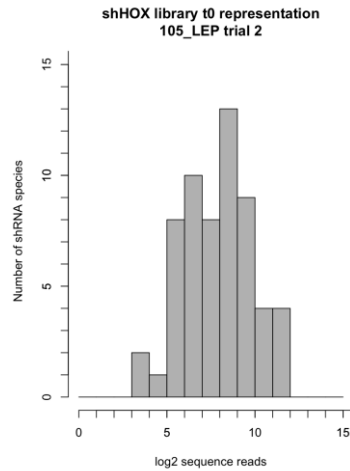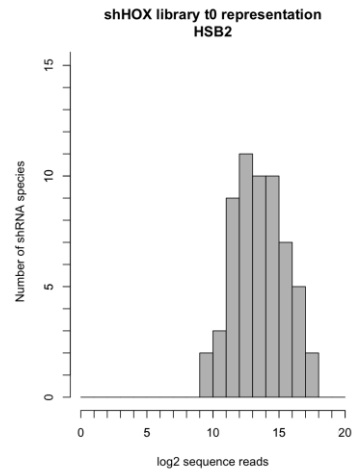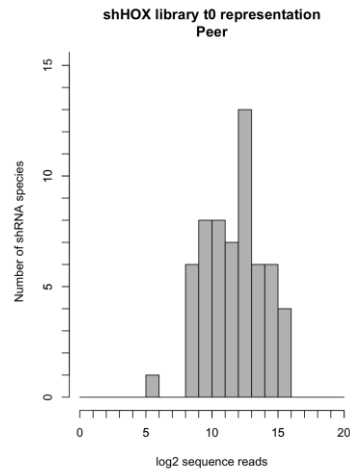

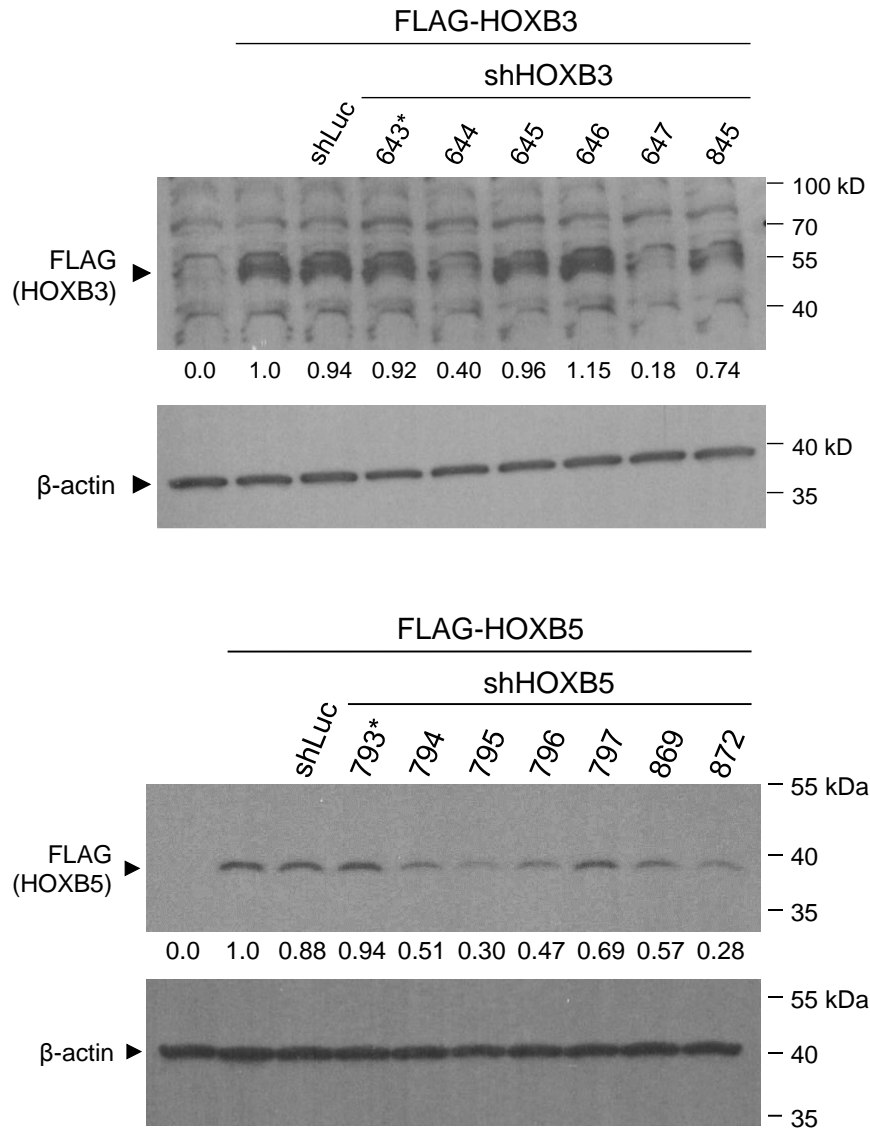

### Supplementary Figure 15. Western blot validation of HOXB3 and HOXB5 knock-down

HOXB3 and HOXB5 protein levels by western blot assay. The human T-ALL cell line PF382 was first transduced with lentiviral FLAG-tagged HOXB3 or HOXB5 cDNA expression constructs. Transduced cells were FACS sorted (per blue fluorescent protein viral marker), and subsequently transduced with shRNA lentiviruses targeting HOXB3, HOXB5, or luciferase control (shLuc) with puromycin-resistance marker. shRNA-transduced cultures were selected with puromycin ( $1 \mu\text{g ml}^{-1}$ ) for 3 days starting at day 2 post-transduction. Whole cell lysates were prepared and used for western blotting with antibodies as indicated. Numbers below each panel indicate band intensities after normalization to the  $\beta$ -actin loading control and are expressed relative to cells not transduced with shRNA virus. Full TRC designations for shRNA clones are provided in **Supplementary Table 6**.

\*shHOXB3\_643 and shHOXB5\_793 clones target 3' UTRs which were not present in the FLAG-tagged cDNA expression constructs.



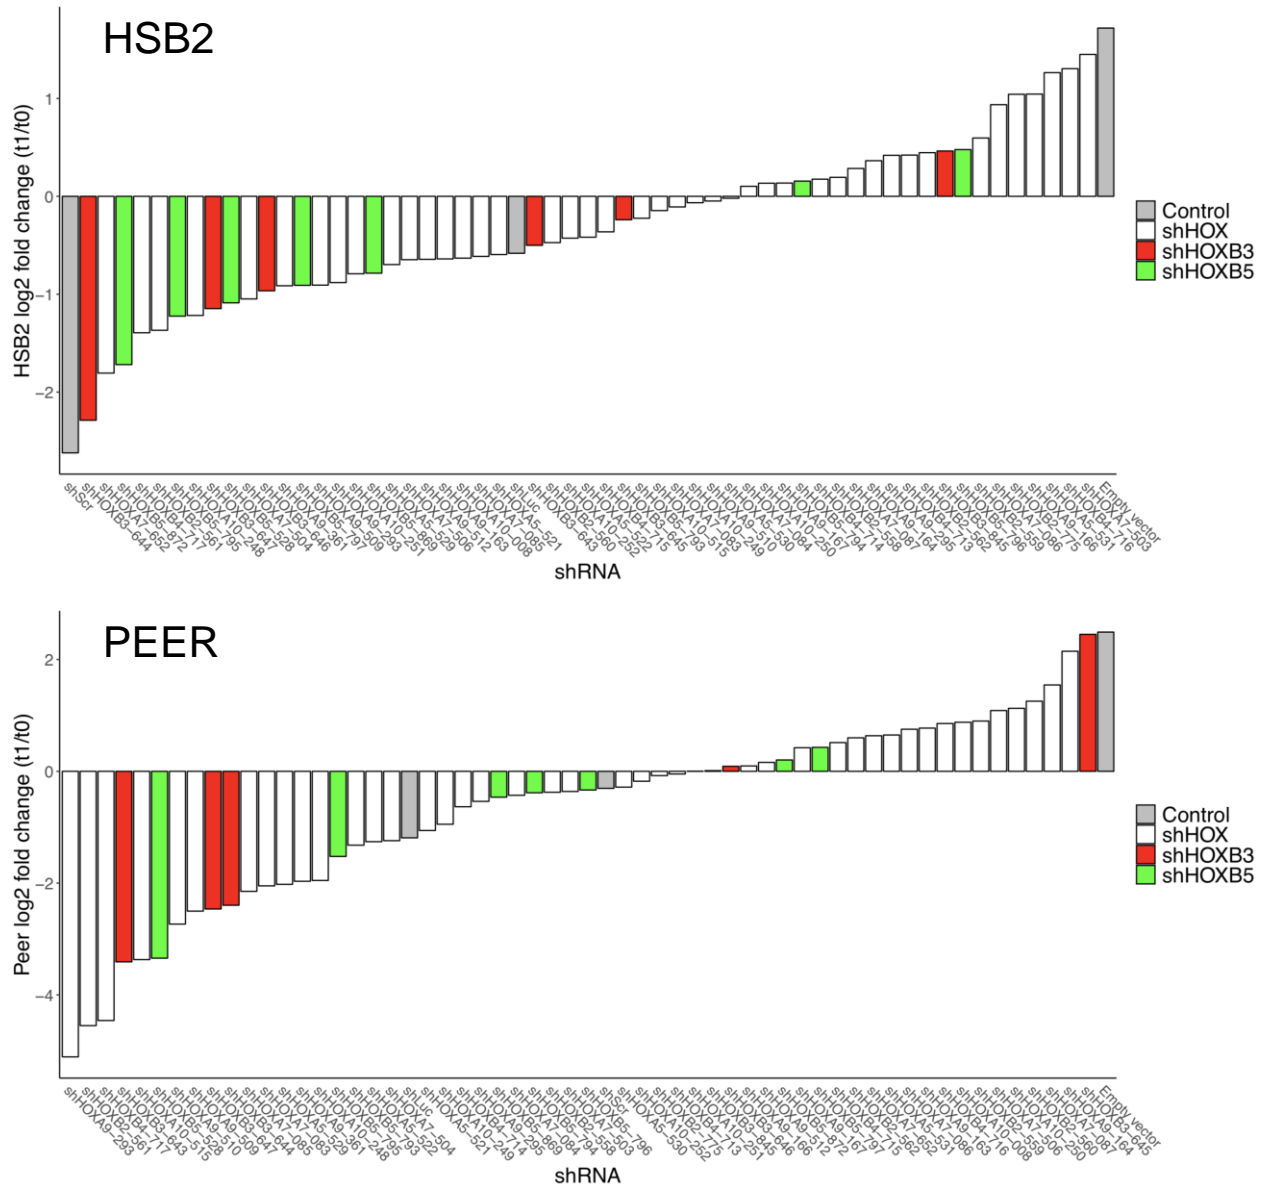

**Supplementary Figure 16. Pooled HOX shRNA screen performed in established human T-ALL cell lines**

Bar plot of HOX shRNA depletion/enrichment. Human T-ALL cell lines HSB2 and PEER were transduced with a pool of 56 lentiviral shRNAs targeting HOX genes (B2-B5, A5, A7, A9, A10) plus 3 non-targeting controls. Cells were harvested on days 2 (t0) and 9 (t1) post-transduction and genomic DNA extracted. Proviral shRNAs were enumerated by PCR amplification and NGS. The experiment was performed once in each of the two cell lines.

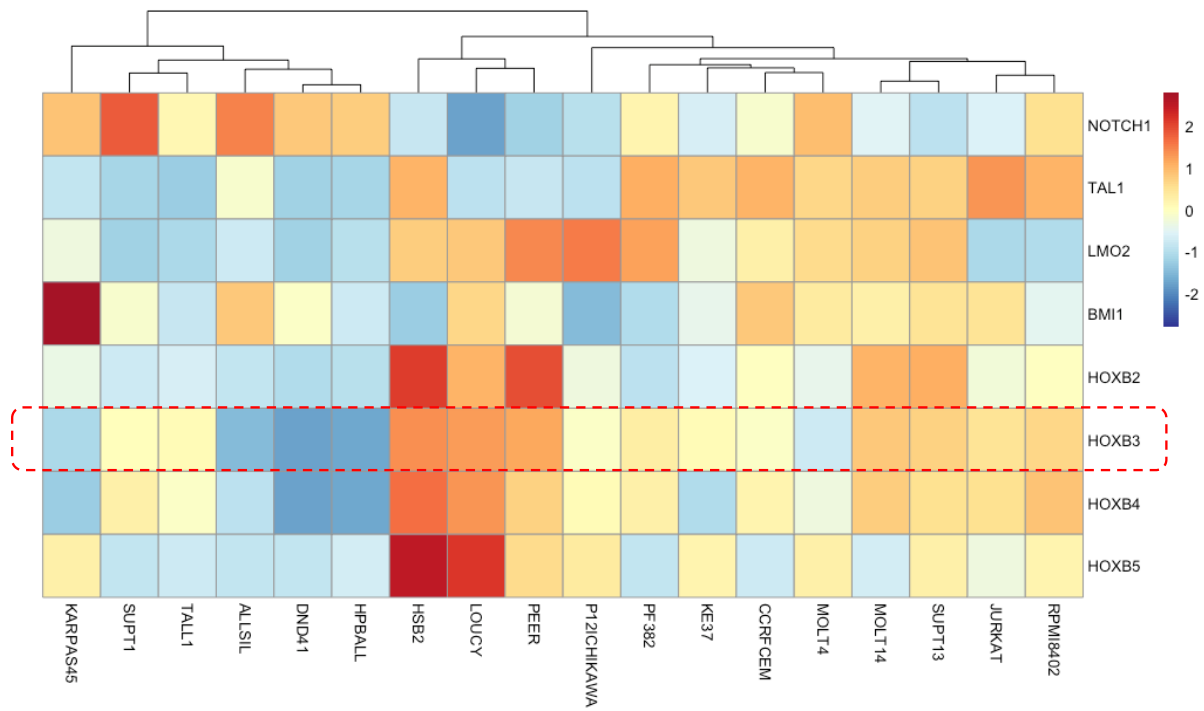

### Supplementary Figure 17. NLTB and HOXB mRNA expression levels in established human T-ALL cell lines

mRNA expression heatmap. Rlog values were calculated from RNA-seq data using DESeq2. Heatmap is scaled by gene (=row) with mean=0 and SD=1.

Data are reanalyzed from EGA accession EGAD00001000849<sup>3</sup>.

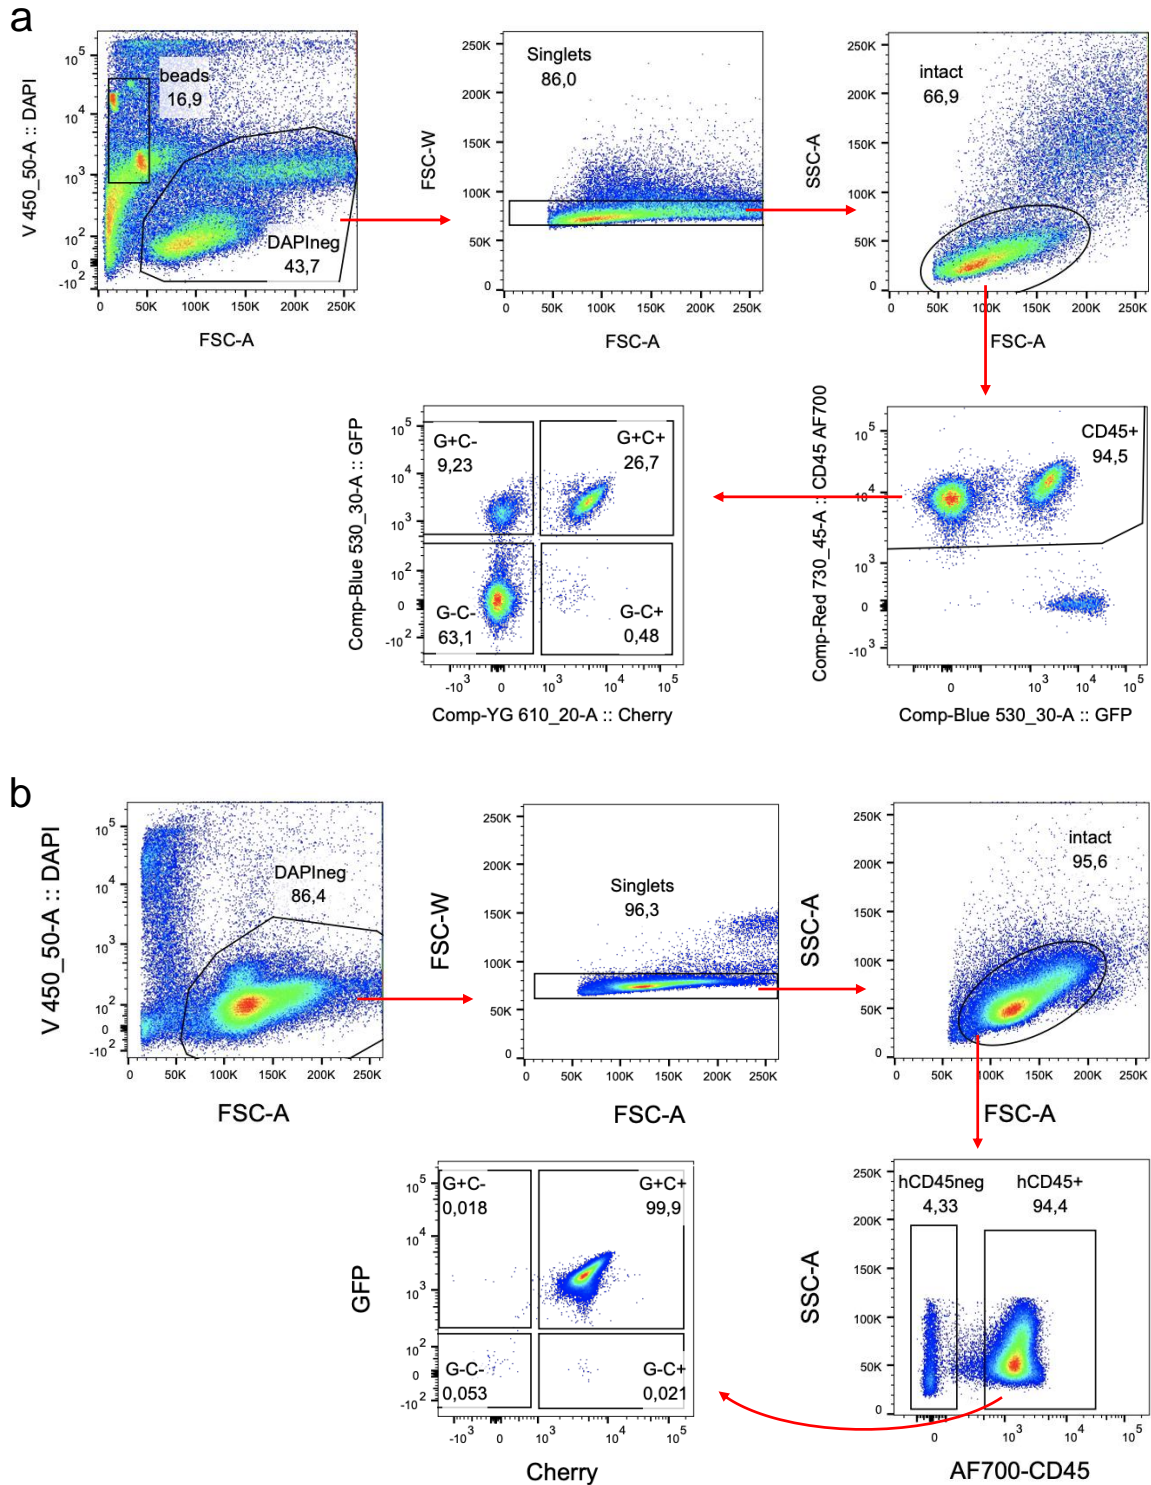

**Supplementary Figure 18. Gating strategies used for flow cytometry analysis and sorting**

Gating used to analyze/sort cells from **a)** *in vitro* cultures presented in Figs 1b, 1c, 1d, 1e, 3a, 3d, and 5a-d, and Supplementary Figs 1, 2, 7, 9, and 10; and **b)** *in vivo* samples presented in Supplementary Fig 3.

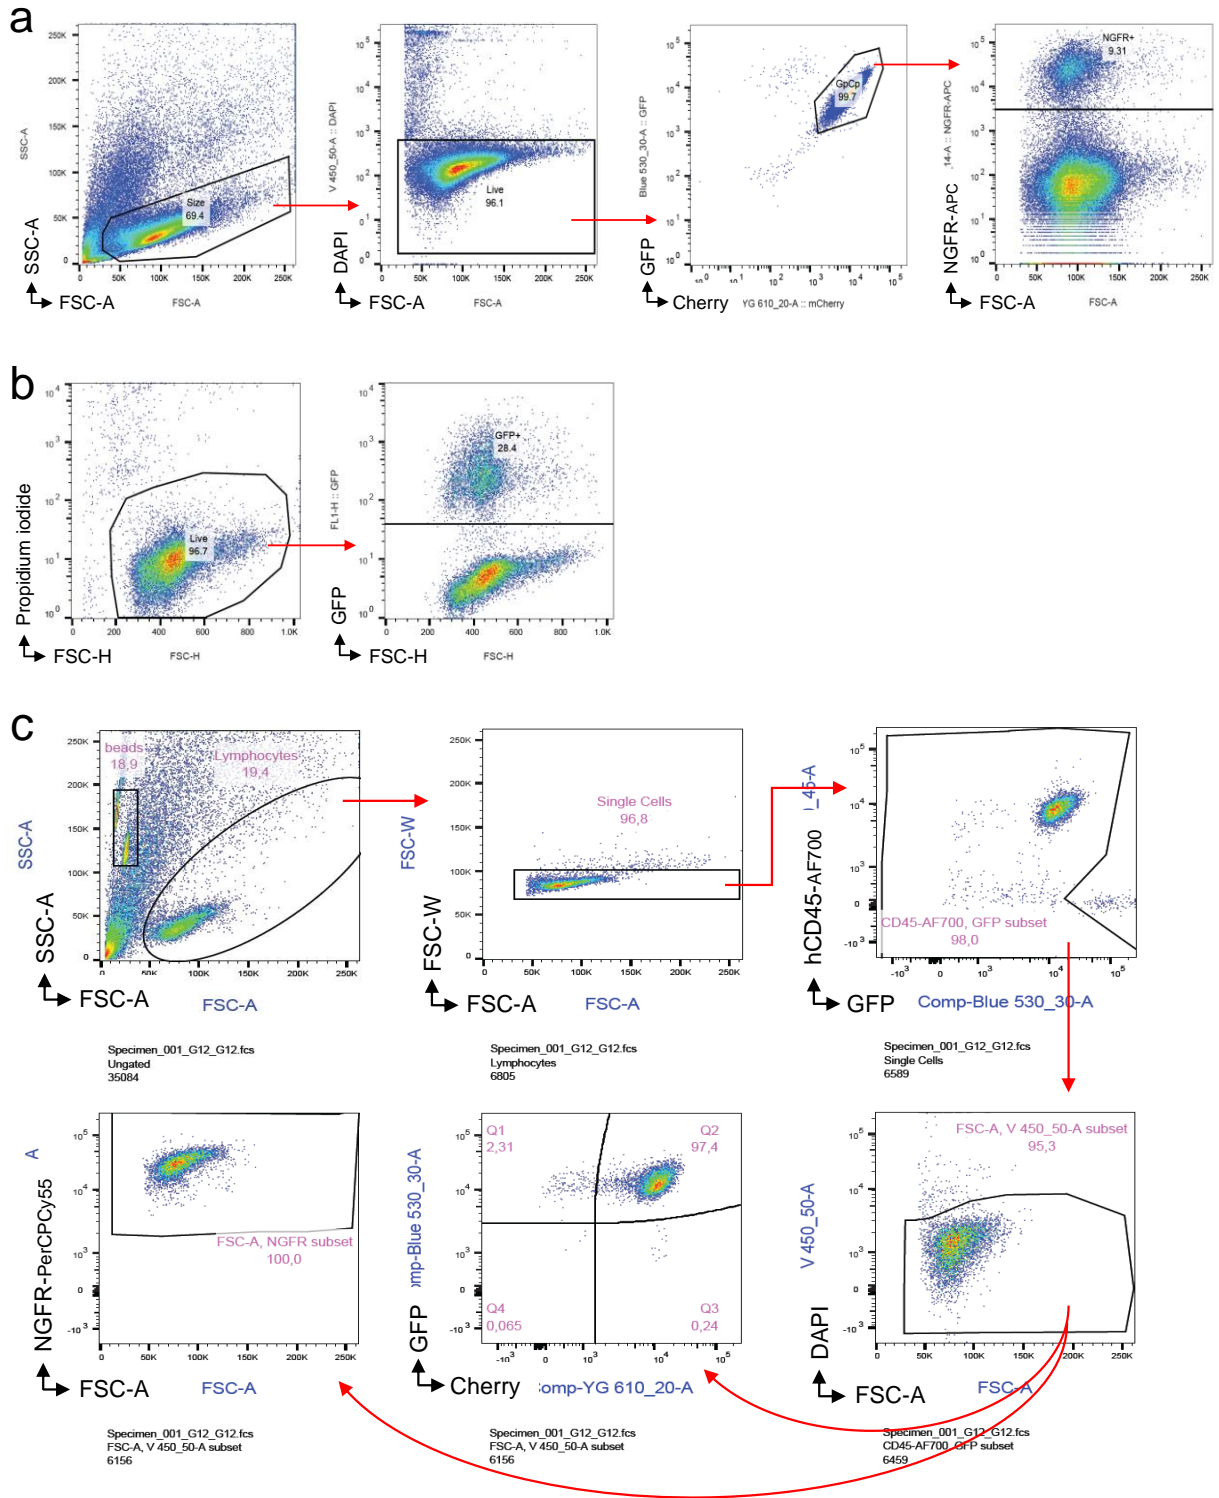

**Supplementary Figure 19. Gating strategies used for flow cytometry analysis**

Gating used to analyze cells from *in vitro* cultures presented in a) Fig 8c, b) Fig 8d, and c) Fig 8e.

## Supplementary Table 1. Reactome pathway analysis – genes upregulated in NLTB-transduced CB cells

Analysis was performed with the list of 243 genes upregulated in NLTB (G+C+) vs. non-transduced (G-C-) CB cells as depicted in **Fig 5a**. Entries are ordered by increasing FDR. Pathways related to HOX genes are highlighted in red bold text.

| Pathway ID    | Pathway name                                                                                | p-Value (<0.01) | FDR      | Submitted entities found                                                                                            |
|---------------|---------------------------------------------------------------------------------------------|-----------------|----------|---------------------------------------------------------------------------------------------------------------------|
| R-HSA-9013508 | NOTCH3 Intracellular Domain Regulates Transcription                                         | 1.21E-06        | 8.10E-04 | HEYL;WWC1;HEY2;HES1                                                                                                 |
| R-HSA-9012852 | Signaling by NOTCH3                                                                         | 9.25E-06        | 0.0031   | HEYL;WWC1;HEY2;HES1;EGFR                                                                                            |
| R-HSA-9013695 | NOTCH4 Intracellular Domain Regulates Transcription                                         | 2.16E-05        | 0.0048   | FLT4;HEY2;HES1                                                                                                      |
| R-HSA-5619507 | <b>Activation of HOX genes during differentiation</b>                                       | 4.20E-05        | 0.0056   | CNOT6;MAFB;HOXB4;HOXB3;HOXB2                                                                                        |
| R-HSA-5617472 | <b>Activation of anterior HOX genes in hindbrain development during early embryogenesis</b> | 4.20E-05        | 0.0056   | CNOT6;MAFB;HOXB4;HOXB3;HOXB2                                                                                        |
| R-HSA-194313  | VEGF ligand-receptor interactions                                                           | 6.82E-04        | 0.0598   | FLT1;FLT4;VEGFA                                                                                                     |
| R-HSA-195399  | VEGF binds to VEGFR leading to receptor dimerization                                        | 6.82E-04        | 0.0598   | FLT1;FLT4;VEGFA                                                                                                     |
| R-HSA-1433557 | Signaling by SCF-KIT                                                                        | 7.21E-04        | 0.0598   | STAT5A;STAT3;PRKCA;PTPN6;MMP9;SH2B2                                                                                 |
| R-HSA-8866910 | TFAP2 (AP-2) family regulates transcription of growth factors and their receptors           | 0.0011          | 0.0796   | EGFR;VEGFA                                                                                                          |
| R-HSA-2122947 | NOTCH1 Intracellular Domain Regulates Transcription                                         | 0.0013          | 0.0847   | HEYL;HEY2;HES1                                                                                                      |
| R-HSA-3000171 | Non-integrin membrane-ECM interactions                                                      | 0.0020          | 0.1180   | ITGB5;ITGA2;LAMC2;PRKCA;DMD;THBS1                                                                                   |
| R-HSA-9006934 | Signaling by Receptor Tyrosine Kinases                                                      | 0.0033          | 0.1271   | STAT5A;VAV3;PRR5;MEF2C;FLT1;ITGA2;FLT4;STAT3;LAMC2;PRKCA;FURIN;MMP9;THBS1;EGFR;VEGFA;ADCYAP1;PTPN6;WASF1;TNS3;SH2B2 |
| R-HSA-2894862 | Constitutive Signaling by NOTCH1 HD+PEST Domain Mutants                                     | 0.0033          | 0.1271   | HEYL;HEY2;HES1                                                                                                      |
| R-HSA-2644606 | Constitutive Signaling by NOTCH1 PEST Domain Mutants                                        | 0.0033          | 0.1271   | HEYL;HEY2;HES1                                                                                                      |
| R-HSA-2644602 | Signaling by NOTCH1 PEST Domain Mutants in Cancer                                           | 0.0033          | 0.1271   | HEYL;HEY2;HES1                                                                                                      |
| R-HSA-2894858 | Signaling by NOTCH1 HD+PEST Domain Mutants in Cancer                                        | 0.0033          | 0.1271   | HEYL;HEY2;HES1                                                                                                      |
| R-HSA-2644603 | Signaling by NOTCH1 in Cancer                                                               | 0.0033          | 0.1271   | HEYL;HEY2;HES1                                                                                                      |
| R-HSA-3000170 | Syndecan interactions                                                                       | 0.0034          | 0.1271   | ITGB5;ITGA2;PRKCA;THBS1                                                                                             |
| R-HSA-1234158 | Regulation of gene expression by Hypoxia-inducible Factor                                   | 0.0040          | 0.1414   | EPAS1;VEGFA                                                                                                         |
| R-HSA-6785807 | Interleukin-4 and Interleukin-13 signaling                                                  | 0.0054          | 0.1711   | STAT3;RHOA;RORA;PTGS2;MMP9;VEGFA                                                                                    |
| R-HSA-6804759 | Regulation of TP53 Activity through Association with Co-factors                             | 0.0057          | 0.1711   | POU4F1;ZNF385A                                                                                                      |
| R-HSA-5676594 | TNF receptor superfamily (TNFSF) members mediating non-canonical NF- $\kappa$ B pathway     | 0.0057          | 0.1711   | CD40;CD40LG;TNFRSF13C                                                                                               |

|               |                                                      |        |        |                                       |
|---------------|------------------------------------------------------|--------|--------|---------------------------------------|
| R-HSA-1433559 | Regulation of KIT signaling                          | 0.0067 | 0.1800 | PRKCA;PTPN6;SH2B2                     |
| R-HSA-417957  | P2Y receptors                                        | 0.0067 | 0.1800 | GPR17;P2RY11;P2RY2                    |
| R-HSA-452723  | Transcriptional regulation of pluripotent stem cells | 0.0074 | 0.1921 | EPAS1;STAT3;DKK1                      |
| R-HSA-194138  | Signaling by VEGF                                    | 0.0078 | 0.1958 | VAV3;PRR5;FLT1;FLT4;PRKCA;WASF1;VEGFA |
| R-HSA-1980143 | Signaling by NOTCH1                                  | 0.0086 | 0.1990 | HEYL;HEY2;HES1                        |
| R-HSA-157118  | Signaling by NOTCH                                   | 0.0087 | 0.1990 | HEYL;FLT4;WWC1;HEY2;HES1;FURIN;EGFR   |
| R-HSA-445355  | Smooth Muscle Contraction                            | 0.0096 | 0.2200 | ITGB5;CALD1;ITGA1;SORBS1              |

## Supplementary Table 2. Reactome pathway analysis – genes downregulated in NLTB-transduced CB cells

Analysis was performed with the list of 225 genes downregulated in NLTB (G+C+) vs. non-transduced (G-C-) CB cells as depicted in **Fig 5a**. Entries are ordered by increasing FDR.

| Pathway ID    | Pathway name                                                                | p-Value (<0.01) | FDR    | Submitted entities found                                                                                                                                                                                                                                                                                                                                                                               |
|---------------|-----------------------------------------------------------------------------|-----------------|--------|--------------------------------------------------------------------------------------------------------------------------------------------------------------------------------------------------------------------------------------------------------------------------------------------------------------------------------------------------------------------------------------------------------|
| R-HSA-168256  | Immune System                                                               | 2.38E-06        | 0.0014 | FCN1;CSF3R;SERPINA1;MS4A3;FLT3;CLEC10A;RORC;EPX;MPO;GLIPR1;CDH1;BLNK;ITGAX;CD36;RAG2;TNFRSF4;CCR2;IL13RA1;RAG1;DUSP4;FCER1G;TNFRSF18;CYBB;RNASE2;NCR2;CLEC4C;JAML;CD8B;IL1B;CD300E;TLR7;PRTN3;SLC29A1;S100A8;SERPINB10;CAMK2D;CLEC12A;CEBPD;KLRB1;CD1C;DTX4;RASGRP1;CD1A;LILRA4;CS T3;BTLA;SLAMF7;HLA-DQA1;IL32;MGAM;FYB1;SMAD3;PTPN13;S100B;LYZ;PTPN14;LILRB4;PTK2;CD4;IL2RA;MNDA;TNFSF8;PDCD1;C D247 |
| R-HSA-449147  | Signaling by Interleukins                                                   | 5.47E-06        | 0.0017 | IL32;DUSP4;CSF3R;SMAD3;CEBPD;FLT3;RORC;PTPN13;S100B;PTPN14;CD4;IL1B;IL2RA;BLNK;ITGAX;PRTN3;CD 36;RAG2;CCR2;IL13RA1;RAG1                                                                                                                                                                                                                                                                                |
| R-HSA-6798695 | Neutrophil degranulation                                                    | 2.31E-05        | 0.0046 | SERPINB10;FCN1;MGAM;FCER1G;MS4A3;SERPINA1;CL EC12A;CYBB;RNASE2;EPX;LYZ;LILRB4;MPO;CST3;GLIPR 1;CLEC4C;ITGAX;MNDA;PRTN3;CD36;SLC29A1;S100A8                                                                                                                                                                                                                                                             |
| R-HSA-449836  | Other interleukin signaling                                                 | 1.21E-04        | 0.0183 | IL32;CD4;CSF3R;FLT3;PRTN3                                                                                                                                                                                                                                                                                                                                                                              |
| R-HSA-1280215 | Cytokine Signaling in Immune system                                         | 1.51E-04        | 0.0183 | CAMK2D;CSF3R;CEBPD;FLT3;RORC;BLNK;ITGAX;CD36; RAG2;TNFRSF4;HLA-DQA1;CCR2;IL13RA1;RAG1;IL32;DUSP4;SMAD3;TNFRS F18;PTPN13;S100B;PTPN14;CD4;IL1B;IL2RA;TNFSF8;P RTN3                                                                                                                                                                                                                                      |
| R-HSA-8877330 | RUNX1 and FOXP3 control the development of regulatory T lymphocytes (Tregs) | 2.78E-04        | 0.0278 | IL2RA;TNFRSF18                                                                                                                                                                                                                                                                                                                                                                                         |
| R-HSA-5660668 | CLEC7A/inflammasome pathway                                                 | 4.39E-04        | 0.0377 | IL1B                                                                                                                                                                                                                                                                                                                                                                                                   |
| R-HSA-9008059 | Interleukin-37 signaling                                                    | 5.34E-04        | 0.0401 | SMAD3;PTPN13;PTPN14                                                                                                                                                                                                                                                                                                                                                                                    |
| R-HSA-389948  | PD-1 signaling                                                              | 0.0014          | 0.0960 | CD4;PDCD1;CD247;HLA-DQA1                                                                                                                                                                                                                                                                                                                                                                               |
| R-HSA-6785807 | Interleukin-4 and Interleukin-13 signaling                                  | 0.0017          | 0.1016 | CEBPD;IL1B;RORC;ITGAX;CD36;IL13RA1                                                                                                                                                                                                                                                                                                                                                                     |
| R-HSA-380108  | Chemokine receptors bind chemokines                                         | 0.0019          | 0.1016 | CX3CR1;CXCR4;CCR8;CCR2                                                                                                                                                                                                                                                                                                                                                                                 |
| R-HSA-168249  | Innate Immune System                                                        | 0.0020          | 0.1016 | SERPINB10;FCN1;MS4A3;SERPINA1;CLEC12A;CLEC10A ;EPX;DTX4;RASGRP1;MPO;CST3;GLIPR1;ITGAX;CD36;C CR2;DUSP4;MGAM;FCER1G;CYBB;LYZ;S100B;RNASE2;L ILRB4;PTK2;NCR2;CD4;CLEC4C;IL1B;CD300E;MNDA;TL R7;PRTN3;CD247;SLC29A1;S100A8                                                                                                                                                                                |
| R-HSA-5683057 | MAPK family signaling cascades                                              | 0.0027          | 0.1249 | DUSP4;CAMK2D;RASA3;FLT3;IL2RA;KIT;RASAL2;RAG2; DUSP16;RASGRP1;PTK2;RAG1                                                                                                                                                                                                                                                                                                                                |
| R-HSA-1475029 | Reversible hydration of carbon dioxide                                      | 0.0037          | 0.1587 | CA2;CA6                                                                                                                                                                                                                                                                                                                                                                                                |
| R-HSA-202433  | Generation of second messenger molecules                                    | 0.0042          | 0.1587 | CD4;FYB1;CD247;HLA-DQA1                                                                                                                                                                                                                                                                                                                                                                                |
| R-HSA-9013508 | NOTCH3 Intracellular Domain Regulates Transcription                         | 0.0043          | 0.1587 | PTCRA;PBX1                                                                                                                                                                                                                                                                                                                                                                                             |

|               |                                                                          |        |        |                                                                       |
|---------------|--------------------------------------------------------------------------|--------|--------|-----------------------------------------------------------------------|
| R-HSA-198933  | Immunoregulatory interactions between a Lymphoid and a non-Lymphoid cell | 0.0051 | 0.1709 | NCR2;CD8B;JAML;KLRB1;CDH1;CD300E;SLAMF7;CD247;CD1C;LILRB4;CD1A;LILRA4 |
| R-HSA-2129379 | Molecules associated with elastic fibres                                 | 0.0052 | 0.1709 | FBN2;MFAP4;BMP10;FBLN1                                                |
| R-HSA-202430  | Translocation of ZAP-70 to Immunological synapse                         | 0.0073 | 0.2267 | CD4;CD247;HLA-DQA1                                                    |
| R-HSA-388841  | Costimulation by the CD28 family                                         | 0.0087 | 0.2589 | CD4;BTLA;PDCCD1;CD247;HLA-DQA1                                        |
| R-HSA-202427  | Phosphorylation of CD3 and TCR zeta chains                               | 0.0092 | 0.2589 | CD4;CD247;HLA-DQA1                                                    |
| R-HSA-1566948 | Elastic fibre formation                                                  | 0.0100 | 0.2689 | FBN2;MFAP4;BMP10;FBLN1                                                |



### Supplementary Table 3. Reactome pathway analysis – genes upregulated *in vivo*

Analysis was performed with the list of 31 genes upregulated in primary NLTB leukemia cells vs. NLTB-transduced CB cells cultured *in vitro*. Entries are ordered by increasing FDR.

| Pathway ID    | Pathway name                                                    | p-Value (<0.01) | FDR      | Submitted entities found |
|---------------|-----------------------------------------------------------------|-----------------|----------|--------------------------|
| R-HSA-9013508 | NOTCH3 Intracellular Domain Regulates Transcription             | 1.88E-06        | 1.93E-04 | PTCRA;HEY1               |
| R-HSA-9012852 | Signaling by NOTCH3                                             | 1.68E-05        | 8.56E-04 | PTCRA;HEY1               |
| R-HSA-9013695 | NOTCH4 Intracellular Domain Regulates Transcription             | 0.0018          | 0.0627   | HEY1                     |
| R-HSA-157118  | Signaling by NOTCH                                              | 0.0033          | 0.0711   | PTCRA;HEY1               |
| R-HSA-6802948 | Signaling by high-kinase activity BRAF mutants                  | 0.0056          | 0.0711   | KSR2                     |
| R-HSA-5674135 | MAP2K and MAPK activation                                       | 0.0058          | 0.0711   | KSR2                     |
| R-HSA-6802946 | Signaling by moderate kinase activity BRAF mutants              | 0.0071          | 0.0711   | KSR2                     |
| R-HSA-6802955 | Paradoxical activation of RAF signaling by kinase inactive BRAF | 0.0074          | 0.0711   | KSR2                     |
| R-HSA-2122947 | NOTCH1 Intracellular Domain Regulates Transcription             | 0.0082          | 0.0711   | HEY1                     |

#### Supplementary Table 4. Reactome pathway analysis – genes downregulated *in vivo*

Analysis was performed with the list of 96 genes downregulated in primary NLTB leukemia cells vs. NLTB-transduced CB cells cultured *in vitro*. Entries are ordered by increasing FDR.

| Pathway ID    | Pathway name                                                | p-Value (<0.01) | FDR      | Submitted entities found                                                                                                                                                                |
|---------------|-------------------------------------------------------------|-----------------|----------|-----------------------------------------------------------------------------------------------------------------------------------------------------------------------------------------|
| R-HSA-9012546 | Interleukin-18 signaling                                    | 5.18E-08        | 1.68E-05 | ALOX5;IL18                                                                                                                                                                              |
| R-HSA-6783783 | Interleukin-10 signaling                                    | 8.97E-07        | 1.45E-04 | CXCL8;IL1R1;IL18;PTGS2                                                                                                                                                                  |
| R-HSA-6785807 | Interleukin-4 and Interleukin-13 signaling                  | 2.25E-06        | 2.20E-04 | CXCL8;ALOX5;IL18;STAT4;RORA;PTGS2                                                                                                                                                       |
| R-HSA-1280215 | Cytokine Signaling in Immune system                         | 2.72E-06        | 2.20E-04 | SOCS2;CXCL8;IL1R1;ALOX5;HLA-DPB1;IL18;STAT4;IRF5;RORA;SAMHD1;PTGS2;HLA-DPA1                                                                                                             |
| R-HSA-168256  | Immune System                                               | 1.02E-05        | 6.56E-04 | CXCL8;CFH;RORA;SAMHD1;PTGS2;PLD1;SOCS2;HLA-DMA;ALOX5;STAT4;ATP6V0A4;CCR6;CD34;CD33;HLA-DPA1;SIGLEC12;IL1R1;SIGLEC10;IL18;COMMD3;SERPIN B6;HLA-DPB1;BTK;IRF5;DOCK1;SLC27A2;CD200;SIGLEC6 |
| R-HSA-449147  | Signaling by Interleukins                                   | 3.31E-05        | 0.0018   | SOCS2;CXCL8;IL1R1;ALOX5;IL18;STAT4;RORA;PTGS2                                                                                                                                           |
| R-HSA-8935964 | RUNX1 regulates expression of components of tight junctions | 0.0022          | 0.1007   | CLDN5                                                                                                                                                                                   |
| R-HSA-156590  | Glutathione conjugation                                     | 0.0027          | 0.1007   | HPGDS;GSTM1                                                                                                                                                                             |
| R-HSA-446652  | Interleukin-1 family signaling                              | 0.0028          | 0.1007   | IL1R1;ALOX5;IL18                                                                                                                                                                        |
| R-HSA-9020958 | Interleukin-21 signaling                                    | 0.0049          | 0.1557   | STAT4                                                                                                                                                                                   |
| R-HSA-913531  | Interferon Signaling                                        | 0.0066          | 0.1928   | STAT4;HLA-DPB1;IRF5;SAMHD1;HLA-DPA1                                                                                                                                                     |
| R-HSA-380108  | Chemokine receptors bind chemokines                         | 0.0083          | 0.2030   | CXCL8;CCR6                                                                                                                                                                              |
| R-HSA-8984722 | Interleukin-35 Signalling                                   | 0.0085          | 0.2030   | STAT4                                                                                                                                                                                   |

**Supplementary Table 5. HOXB mRNA expression values for the HOXB “high” patient subgroup**

mRNA expression values (FPKM) from COG TARGET cases (n=252) with greater than 80<sup>th</sup> percentile rank and FPKM >1 for HOXB2 or B3 or B4 or B5. Values categorizing within the high subgroup for each gene are highlighted. Data are reanalyzed from NCBI dbGaP accession phs000218/000464<sup>1</sup>.

| Patient ID  | HOXB2   | HOXB3  | HOXB4  | HOXB5  | First Event | Event Free Survival (Time in Days) |
|-------------|---------|--------|--------|--------|-------------|------------------------------------|
| SJALL015245 | 0.7241  | 1.6321 | 1.302  | 0      | 0           | 2932                               |
| SJALL015248 | 2.3322  | 2.286  | 0.8438 | 0      | 0           | 1939                               |
| SJALL015260 | 4.7672  | 0.7558 | 1.2805 | 0      | 0           | 3003                               |
| SJALL015261 | 4.2975  | 0.8235 | 2.1856 | 0      | 0           | 2995                               |
| SJALL015263 | 4.6286  | 3.0254 | 1.0917 | 0      | 0           | 2989                               |
| SJALL015264 | 0.099   | 1.2037 | 1.313  | 0      | 1           | 1300                               |
| SJALL015267 | 3.0569  | 1.4251 | 1.8768 | 0      | 0           | 2247                               |
| SJALL015272 | 2.6326  | 1.6002 | 0.5976 | 0      | 0           | 2995                               |
| SJALL015274 | 0.0219  | 0.595  | 1.2918 | 0      | 0           | 2443                               |
| SJALL015275 | 1.9086  | 1.6238 | 1.4765 | 0      | 1           | 110                                |
| SJALL015278 | 1.0881  | 0.3338 | 1.3078 | 0      | 0           | 3158                               |
| SJALL015281 | 5.3149  | 1.842  | 1.7475 | 0      | 0           | 3086                               |
| SJALL015282 | 8.4286  | 5.031  | 0.7999 | 0      | 0           | 2769                               |
| SJALL015586 | 0.0188  | 1.4063 | 1.2307 | 0      | 0           | 3399                               |
| SJALL015622 | 5.1409  | 2.1087 | 2.7936 | 0      | 1           | 149                                |
| SJALL015640 | 13.7776 | 8.7685 | 1.2714 | 0      | 0           | 2403                               |
| SJALL015643 | 12.006  | 7.1978 | 1.2355 | 0      | 0           | 2238                               |
| SJALL015644 | 5.8083  | 1.1979 | 1.4931 | 0      | 0           | 2306                               |
| SJALL015645 | 3.6969  | 2.4862 | 2.5003 | 0      | 0           | 2426                               |
| SJALL015647 | 2.5823  | 1.4901 | 1.2203 | 0.0164 | 0           | 2126                               |
| SJALL015648 | 3.9945  | 1.055  | 1.5849 | 0      | 0           | 2321                               |
| SJALL015655 | 2.1387  | 0.8363 | 1.5712 | 0      | 0           | 2324                               |
| SJALL015658 | 2.079   | 1.143  | 1.5608 | 0      | 1           | 440                                |
| SJALL015659 | 1.6982  | 1.2219 | 1.3344 | 0      | 1           | 425                                |
| SJALL015661 | 0.3495  | 0.7589 | 1.2761 | 0.0212 | 0           | 2006                               |
| SJALL015669 | 1.7718  | 1.724  | 0.1842 | 0      | 0           | 2167                               |
| SJALL015670 | 6.5121  | 0.9294 | 1.8997 | 0      | 1           | 191                                |
| SJALL015671 | 3.2649  | 0.6898 | 0.8434 | 0      | 0           | 2083                               |
| SJALL015672 | 6.4878  | 2.3641 | 4.01   | 0      | 0           | 2162                               |
| SJALL015673 | 3.5121  | 0.9481 | 1.3424 | 0      | 0           | 2086                               |
| SJALL015675 | 0.095   | 0.3339 | 1.3002 | 0      | 1           | 2055                               |
| SJALL015687 | 7.7403  | 1.3213 | 1.3882 | 0.0203 | 0           | 2055                               |
| SJALL015696 | 3.6361  | 0.4829 | 0.9363 | 0      | 0           | 1865                               |
| SJALL015701 | 4.874   | 0.553  | 1.0852 | 0      | 0           | 1832                               |
| SJALL015704 | 2.8044  | 1.8431 | 0.8774 | 0      | 0           | 1882                               |
| SJALL015705 | 3.0061  | 0.7809 | 1.5932 | 0.016  | 0           | 1903                               |
| SJALL015706 | 5.1585  | 1.1931 | 1.7151 | 0      | 0           | 1854                               |
| SJALL015709 | 8.2839  | 0.1551 | 0.3421 | 0      | 0           | 1870                               |
| SJALL015713 | 3.8205  | 0.7349 | 1.7235 | 0      | 0           | 1747                               |
| SJALL015714 | 0.0936  | 1.1731 | 1.2934 | 0.0265 | 0           | 1867                               |
| SJALL015989 | 1.8025  | 1.2702 | 0.7685 | 0      | 1           | 357                                |
| SJALL015992 | 3.298   | 1.4034 | 0.625  | 0      | 0           | 2334                               |
| SJALL015993 | 3.1858  | 0.7275 | 0.8201 | 0      | 0           | 2183                               |
| SJALL015994 | 4.5818  | 7.5528 | 4.0936 | 1.4298 | 1           | 1166                               |
| SJALL015996 | 4.4032  | 5.4257 | 3.3025 | 0      | 0           | 2339                               |

|              |         |         |         |        |   |      |
|--------------|---------|---------|---------|--------|---|------|
| SJALL016003  | 2.5617  | 0.5016  | 1.2244  | 0      | 0 | 2178 |
| SJALL016429  | 1.0517  | 1.8301  | 1.6798  | 0      | 0 | 2841 |
| SJALL016436  | 0.208   | 0.7416  | 1.623   | 0      | 0 | 2070 |
| SJALL016437  | 3.7507  | 1.7889  | 2.015   | 0      | 0 | 2370 |
| SJALL016445  | 1.1796  | 1.6722  | 1.6965  | 0      | 0 | 1955 |
| SJALL016653  | 1.3358  | 0.7263  | 1.3172  | 0      | 0 | 2825 |
| SJBALL001653 | 5.2949  | 1.5056  | 0.8127  | 0      | 0 | 2313 |
| SJTALL001636 | 14.8229 | 12.161  | 11.4393 | 0.5089 | 0 | 2440 |
| SJTALL001677 | 7.0182  | 2.1863  | 1.9446  | 0      | 0 | 2340 |
| SJTALL002005 | 4.9066  | 1.2466  | 0.9152  | 0      | 0 | 1687 |
| SJTALL002019 | 2.7894  | 2.8477  | 1.0441  | 0      | 0 | 3058 |
| SJTALL002035 | 2.0346  | 2.6507  | 1.0549  | 0      | 0 | 2432 |
| SJTALL002036 | 2.49    | 2.893   | 1.7156  | 0      | 0 | 2752 |
| SJTALL002049 | 2.5779  | 1.831   | 0.6137  | 0      | 0 | 2652 |
| SJTALL002055 | 2.5068  | 1.1568  | 1.7571  | 0      | 0 | 2359 |
| SJTALL002075 | 7.6001  | 1.6229  | 2.3331  | 0.14   | 0 | 2252 |
| SJTALL002080 | 3.5875  | 1.2202  | 1.6372  | 0      | 0 | 2253 |
| SJTALL002089 | 5.4119  | 8.1788  | 3.6829  | 0.8525 | 0 | 87   |
| SJTALL002105 | 4.0716  | 1.028   | 0.4911  | 0      | 0 | 2025 |
| SJTALL002109 | 3.5022  | 0.7102  | 1.4094  | 0      | 0 | 1469 |
| SJTALL002110 | 2.562   | 0.7844  | 0.4865  | 0      | 1 | 128  |
| SJTALL002151 | 0.9234  | 1.2353  | 0.9046  | 0      | 0 | 1854 |
| SJTALL002258 | 1.1093  | 1.7107  | 0.8959  | 0      | 0 | 821  |
| SJTALL021648 | 2.773   | 1.7805  | 1.1082  | 0.0296 | 0 | 2956 |
| SJTALL021672 | 10.2645 | 8.1433  | 7.1024  | 0.0155 | 0 | 2325 |
| SJTALL021689 | 12.4201 | 18.6501 | 10.7519 | 2.5617 | 1 | 469  |
| SJTALL022098 | 2.9023  | 1.2231  | 1.1455  | 0      | 0 | 2626 |
| SJTALL022100 | 2.8934  | 2.8541  | 2.567   | 0      | 1 | 188  |
| SJTALL022118 | 2.9585  | 2.5481  | 5.9288  | 0      | 0 | 2125 |
| SJTALL022447 | 8.8447  | 15.6342 | 10.3247 | 9.7558 | 0 | 235  |

**Supplementary Table 6. shRNA clones targeting HOX genes and non-targeting controls**

Clones were obtained from the RNAi Consortium (TRC), Addgene, and Sigma-Aldrich (SHC).

| Gene Symbol | Clone ID       | Sequence               |
|-------------|----------------|------------------------|
| HOXA5       | TRCN0000012521 | CCGGACTACCAGTTGCATAAT  |
| HOXA5       | TRCN0000012522 | CCTCTCCGAGAGACAAATTAA  |
| HOXA5       | TRCN0000017528 | GCCATTATAGCGCCTGTATAA  |
| HOXA5       | TRCN0000017529 | CCGCAGAAGGAGGATTGAAAT  |
| HOXA5       | TRCN0000017530 | GCTGCACATAAGTCATGACAA  |
| HOXA5       | TRCN0000017531 | CAGTTGCATAATTATGGAGAT  |
| HOXA7       | TRCN0000012503 | GAAGTGGAAAGAAAGAGCATAA |
| HOXA7       | TRCN0000012504 | CGGGCTTATACAATGTCAACA  |
| HOXA7       | TRCN0000012506 | CGAGCCGACTTCTTGCTCCTT  |
| HOXA7       | TRCN0000015083 | CTTTAAGAGACTCACTGGTTT  |
| HOXA7       | TRCN0000015084 | TCCGGGCTTATACAATGTCAA  |
| HOXA7       | TRCN0000015085 | GTGGAAGAAAGAGCATAAGGA  |
| HOXA7       | TRCN0000015086 | CCTCGACCGTTCGGGCTTAT   |
| HOXA7       | TRCN0000015087 | GATGCGGTCTTCAGGACCTGA  |
| HOXA7       | TRCN0000240652 | TCTGGTTCAGAACCGCCGAA   |
| HOXA9       | TRCN0000012509 | CACGCTTGACTCACACTTT    |
| HOXA9       | TRCN0000012510 | GTGGTTCTCCTCCAGTTGATA  |
| HOXA9       | TRCN0000012512 | GCATTAACCTGAACCGCTCT   |
| HOXA9       | TRCN0000015163 | CGGGCATTAAAGTCTGTCCAT  |
| HOXA9       | TRCN0000015164 | CGCCTCGTGGAAACCCAGTGCA |
| HOXA9       | TRCN0000015166 | CGCTGTACCCGCTGCGGTGTA  |
| HOXA9       | TRCN0000015167 | CAGTCCAAGGCGACGGTGTTT  |
| HOXA9       | TRCN0000271293 | TGGTTCTCCTCCAGTTGATAG  |
| HOXA9       | TRCN0000271295 | TGCTGATTGTAACGGAGTTAA  |
| HOXA9       | TRCN0000284361 | GATGCCATTTGGGCTTATTTA  |
| HOXA10      | TRCN0000012515 | CGCAGGATGAACTGAAGAAA   |
| HOXA10      | TRCN0000015248 | CCCTATCTTGTGAAGTTGTTT  |
| HOXA10      | TRCN0000015249 | CGCGCAGAACATCAAAGAAGA  |
| HOXA10      | TRCN0000015250 | CACGGCAAAGAGTGGTCGGAA  |
| HOXA10      | TRCN0000015251 | TCGCCATAGACCTGTGGCTA   |
| HOXA10      | TRCN0000015252 | CTCACGGACAGACAAGTGAAA  |
| HOXA10      | TRCN0000096008 | TGGTTTCAGAACCGCAGGAAT  |
| HOXB2       | TRCN0000015558 | CCAATGAAATCTCAGGAATAA  |
| HOXB2       | TRCN0000015559 | CCGCCAAGAAACCCAGCCAAT  |
| HOXB2       | TRCN0000015560 | CGGCCTTAGCCGTTGCTTA    |
| HOXB2       | TRCN0000015561 | CCCGCTGTCTTGAGACATTT   |
| HOXB2       | TRCN0000015562 | CTTGATGAAAGAGAAGAAAT   |

|                        |                |                        |
|------------------------|----------------|------------------------|
| HOXB2                  | TRCN0000329775 | T TACTGAATTAGCGTTTAATC |
| HOXB3                  | TRCN0000015643 | CGGAAAGGAATCCACATCATA  |
| HOXB3                  | TRCN0000015644 | GCCACTAGCAACAGCAGTAAT  |
| HOXB3                  | TRCN0000015645 | GCCGGCTTCATGAACGCCTTA  |
| HOXB3                  | TRCN0000015646 | GCTGCTCTCTTCGGAGGCTAT  |
| HOXB3                  | TRCN0000015647 | GAATCCAAGAAGCGCCCAAAT  |
| HOXB3                  | TRCN0000070845 | CACCCTACCAAACAGATATT   |
| HOXB4                  | TRCN0000015713 | CCCACACTTTATATACGAATA  |
| HOXB4                  | TRCN0000015714 | AGGAATATTCACAGAGCGATT  |
| HOXB4                  | TRCN0000015715 | AGTTCACGTGAGCACGGTAAA  |
| HOXB4                  | TRCN0000015716 | CCGTCCCACTCCGCGTGCAAA  |
| HOXB4                  | TRCN0000015717 | CGATTACCTACCCAGCGACCA  |
| HOXB5                  | TRCN0000015793 | CGCCAGTGTTTCTGAATGTTT  |
| HOXB5                  | TRCN0000015794 | CCGGACTATCAGTTGCTAAAT  |
| HOXB5                  | TRCN0000015795 | GCTTCACATCAGCCATGATAT  |
| HOXB5                  | TRCN0000015796 | CGGCTACAATTACAATGGGAT  |
| HOXB5                  | TRCN0000015797 | CAGCGCCAATTTACCGAAAT   |
| HOXB5                  | TRCN0000054869 | CCGGCTCTTACGGCTACAATT  |
| HOXB5                  | TRCN0000054872 | CAGCTCTCTGAGCGGCTCTTA  |
| control (Scramble)     | Addgene #1864  | CCTAAGGTTAAGTCGCCCTCG  |
| control (Luciferase)   | SHC007         | CGCTGAGTACTTCGAAATGTC  |
| control (Empty Vector) | SHC001         | none                   |

**Supplementary Table 7. List of oligonucleotide primers used for NGS library construction**

| <b>Primer Name</b>     | <b>Primer Sequence</b>                                                                                                    |
|------------------------|---------------------------------------------------------------------------------------------------------------------------|
| P5_ORF Stag 0a         | AAT GAT ACG GCG ACC ACC GAG ATC TAC ACT CTT TCC CTA CAC GAC GCT CTT CCG ATC TTC TTG TGG AAA GGA CGA                       |
| P5_ORF Stag 1 A        | AAT GAT ACG GCG ACC ACC GAG ATC TAC ACT CTT TCC CTA CAC GAC GCT CTT CCG ATC TAT CTT GTG GAA AGG ACG A                     |
| P5_ORF Stag 2 GA       | AAT GAT ACG GCG ACC ACC GAG ATC TAC ACT CTT TCC CTA CAC GAC GCT CTT CCG ATC TGA TCT TGT GGA AAG GAC GA                    |
| P5_ORF Stag 3 CGA      | AAT GAT ACG GCG ACC ACC GAG ATC TAC ACT CTT TCC CTA CAC GAC GCT CTT CCG ATC TCG ATC TTG TGG AAA GGA CGA                   |
| P5_ORF Stag 4 ACGA     | AAT GAT ACG GCG ACC ACC GAG ATC TAC ACT CTT TCC CTA CAC GAC GCT CTT CCG ATC TAC GAT CTT GTG GAA AGG ACG A                 |
| P5_ORF Stag 6 CTAGAA   | AAT GAT ACG GCG ACC ACC GAG ATC TAC ACT CTT TCC CTA CAC GAC GCT CTT CCG ATC TCT AGA ATC TTG TGG AAA GGA CGA               |
| P5_ORF Stag 7 GACGACA  | AAT GAT ACG GCG ACC ACC GAG ATC TAC ACT CTT TCC CTA CAC GAC GCT CTT CCG ATC TGA CGA CAT CTT GTG GAA AGG ACG A             |
| P5_ORF Stag 8 TGGACACA | AAT GAT ACG GCG ACC ACC GAG ATC TAC ACT CTT TCC CTA CAC GAC GCT CTT CCG ATC TTG GAC ACA TCT TGT GGA AAG GAC GA            |
| P7_IND A01             | CAA GCA GAA GAC GGC ATA CGA GAT CGG TTC AAG TGA CTG GAG TTC AGA CGT GTG CTC TTC CGA TCT TCT ACT ATT CTT TCC CCT GCA CTG T |
| P7_IND A02             | CAA GCA GAA GAC GGC ATA CGA GAT GCT GGA TTG TGA CTG GAG TTC AGA CGT GTG CTC TTC CGA TCT TCT ACT ATT CTT TCC CCT GCA CTG T |
| P7_IND A03             | CAA GCA GAA GAC GGC ATA CGA GAT TAA CTC GGG TGA CTG GAG TTC AGA CGT GTG CTC TTC CGA TCT TCT ACT ATT CTT TCC CCT GCA CTG T |
| P7_IND A04             | CAA GCA GAA GAC GGC ATA CGA GAT TAA CAG TTG TGA CTG GAG TTC AGA CGT GTG CTC TTC CGA TCT TCT ACT ATT CTT TCC CCT GCA CTG T |
| P7_IND A05             | CAA GCA GAA GAC GGC ATA CGA GAT ATA CTC AAG TGA CTG GAG TTC AGA CGT GTG CTC TTC CGA TCT TCT ACT ATT CTT TCC CCT GCA CTG T |
| P7_IND A06             | CAA GCA GAA GAC GGC ATA CGA GAT GCT GAG AAG TGA CTG GAG TTC AGA CGT GTG CTC TTC CGA TCT TCT ACT ATT CTT TCC CCT GCA CTG T |
| P7_IND A07             | CAA GCA GAA GAC GGC ATA CGA GAT ATT GGA GGG TGA CTG GAG TTC AGA CGT GTG CTC TTC CGA TCT TCT ACT ATT CTT TCC CCT GCA CTG T |
| P7_IND A08             | CAA GCA GAA GAC GGC ATA CGA GAT TAG TCT AAG TGA CTG GAG TTC AGA CGT GTG CTC TTC CGA TCT TCT ACT ATT CTT TCC CCT GCA CTG T |
| P7_IND A09             | CAA GCA GAA GAC GGC ATA CGA GAT CGG TGA CCG TGA CTG GAG TTC AGA CGT GTG CTC TTC CGA TCT TCT ACT ATT CTT TCC CCT GCA CTG T |
| P7_IND A10             | CAA GCA GAA GAC GGC ATA CGA GAT TAC AGA GGG TGA CTG GAG TTC AGA CGT GTG CTC TTC CGA TCT TCT ACT ATT CTT TCC CCT GCA CTG T |
| P7_IND A11             | CAA GCA GAA GAC GGC ATA CGA GAT ATT GTC AAG TGA CTG GAG TTC AGA CGT GTG CTC TTC CGA TCT TCT ACT ATT CTT TCC CCT GCA CTG T |
| P7_IND A12             | CAA GCA GAA GAC GGC ATA CGA GAT TAT GTC TTG TGA CTG GAG TTC AGA CGT GTG CTC TTC CGA TCT TCT ACT ATT CTT TCC CCT GCA CTG T |
| P7_IND B01             | CAA GCA GAA GAC GGC ATA CGA GAT ATT GGA TTG TGA CTG GAG TTC AGA CGT GTG CTC TTC CGA TCT TCT ACT ATT CTT TCC CCT GCA CTG T |
| P7_IND B02             | CAA GCA GAA GAC GGC ATA CGA GAT ATA CTC GGG TGA CTG GAG TTC AGA CGT GTG CTC TTC CGA TCT TCT ACT ATT CTT TCC CCT GCA CTG T |
| P7_IND B03             | CAA GCA GAA GAC GGC ATA CGA GAT TAT GAG AAG TGA CTG GAG TTC AGA CGT GTG CTC TTC CGA TCT TCT ACT ATT CTT TCC CCT GCA CTG T |

P7\_IND B04 CAA GCA GAA GAC GGC ATA CGA GAT GCA CAG TTG TGA CTG GAG TTC AGA CGT GTG CTC  
TTC CGA TCT TCT ACT ATT CTT TCC CCT GCA CTG T

P7\_IND B05 CAA GCA GAA GAC GGC ATA CGA GAT CGT GGA TTG TGA CTG GAG TTC AGA CGT GTG CTC  
TTC CGA TCT TCT ACT ATT CTT TCC CCT GCA CTG T

P7\_IND B06 CAA GCA GAA GAC GGC ATA CGA GAT TAG TAG AAG TGA CTG GAG TTC AGA CGT GTG CTC  
TTC CGA TCT TCT ACT ATT CTT TCC CCT GCA CTG T

P7\_IND B07 CAA GCA GAA GAC GGC ATA CGA GAT GCA CGA TTG TGA CTG GAG TTC AGA CGT GTG CTC  
TTC CGA TCT TCT ACT ATT CTT TCC CCT GCA CTG T

P7\_IND B08 CAA GCA GAA GAC GGC ATA CGA GAT CGG TAG CCG TGA CTG GAG TTC AGA CGT GTG CTC  
TTC CGA TCT TCT ACT ATT CTT TCC CCT GCA CTG T

P7\_IND B09 CAA GCA GAA GAC GGC ATA CGA GAT TAG TTC TTG TGA CTG GAG TTC AGA CGT GTG CTC TTC  
CGA TCT TCT ACT ATT CTT TCC CCT GCA CTG T

P7\_IND B10 CAA GCA GAA GAC GGC ATA CGA GAT TAC AAG TTG TGA CTG GAG TTC AGA CGT GTG CTC  
TTC CGA TCT TCT ACT ATT CTT TCC CCT GCA CTG T

P7\_IND B11 CAA GCA GAA GAC GGC ATA CGA GAT ATC ACT GGG TGA CTG GAG TTC AGA CGT GTG CTC  
TTC CGA TCT TCT ACT ATT CTT TCC CCT GCA CTG T

P7\_IND B12 CAA GCA GAA GAC GGC ATA CGA GAT CGC ATC AAG TGA CTG GAG TTC AGA CGT GTG CTC  
TTC CGA TCT TCT ACT ATT CTT TCC CCT GCA CTG T



## Supplementary References

1. Liu Y, *et al.* The genomic landscape of pediatric and young adult T-lineage acute lymphoblastic leukemia. *Nat Genet* **49**, 1211-1218 (2017).
2. Townsend Elizabeth C, *et al.* The Public Repository of Xenografts Enables Discovery and Randomized Phase II-like Trials in Mice. *Cancer Cell* **29**, 574-586 (2016).
3. Kalender Atak Z, *et al.* Comprehensive Analysis of Transcriptome Variation Uncovers Known and Novel Driver Events in T-Cell Acute Lymphoblastic Leukemia. *PLoS Genetics* **9**, e1003997 (2013).
